# Supplementary material for: Six New Antimicrobial Metabolites from the Deep-Sea Sediment-Derived Fungus Aspergillus fumigatus SD-406
Source: MDPI journal article supplement (doi:10.3390/md20010004), 2021-12-21

# Supplementary Material

## Six New Antimicrobial Metabolites from the Deep-sea Sediment Derived Fungus *Aspergillus fumigatus* SD-406

Li-Hong Yan <sup>1,2,3</sup>, Xiao-Ming Li <sup>1,2,4</sup>, Lu-Ping Chi<sup>1,2,3</sup>, Xin Li <sup>1,2,4,\*</sup> and Bin-Gui Wang <sup>1,2,3,4,\*</sup>

### Contents

|                                                                                                                                            |        |
|--------------------------------------------------------------------------------------------------------------------------------------------|--------|
| Table S1. OR calculations of compound <b>10</b> (at 589.4 nm);                                                                             | S1     |
| Table S2. The Cartesian coordinates of the lowest energy conformers (Conf. 1-8) for <b>isomer 1</b> of compounds <b>1a/1b</b> ;            | S1-6   |
| Table S3. The Cartesian coordinates of the lowest energy conformers (Conf. 1-9) for <b>isomer 2f</b> compounds <b>1a/1b</b> ;              | S6-13  |
| Table S4 The Cartesian coordinates of the lowest energy conformers (Conf. 1-6) for <b>isomer 7a</b> of compound <b>7</b> ;                 | S13-17 |
| Table S5 DP4+ probability analysis of compound <b>1a</b> ;                                                                                 | S18-19 |
| Table S6 DP4+ probability analysis of compound <b>1b</b> ;                                                                                 | S20-21 |
| Table S7 DP4+ probability analysis of compound <b>7</b> ;                                                                                  | S22-23 |
| Figure S1. Chiral HPLC analysis of the acidic hydrolysate of compounds <b>1a/1b</b> ;                                                      | S24    |
| Figure S2. <sup>1</sup> H-NMR (500 MHz, DMSO- <i>d</i> <sub>6</sub> ) spectrum of compounds <b>1a/1b</b> ;                                 | S24    |
| Figure S3. <sup>13</sup> C NMR (125 MHz, DMSO- <i>d</i> <sub>6</sub> ) and DEPT spectra of compounds <b>1a/1b</b> ;                        | S25    |
| Figure S4. <sup>1</sup> H- <sup>1</sup> H COSY spectrum of compounds <b>1a/1b</b> ;                                                        | S25    |
| Figure S5. HSQC spectrum of compounds <b>1a/1b</b> ;                                                                                       | S26    |
| Figure S6. HMBC spectrum of compounds <b>1a/1b</b> ;                                                                                       | S26    |
| Figure S7. NOESY spectrum of compounds <b>1a/1b</b> ;                                                                                      | S27    |
| Figure S8. HR-ESI-MS spectrum of compounds <b>1a/1b</b> ;                                                                                  | S27    |
| Figure S9 Optimized geometries of predominant conformers (weighting factors) for <b>isomer 1</b> at the B3LYP/6-311g(d,p) level.           | S28    |
| Figure S10 Optimized geometries of predominant conformers (weighting factors) for <b>isomer 2</b> at the B3LYP/6-311g(d,p) level.          | S28    |
| Figure S11. <sup>1</sup> H-NMR (500 MHz, DMSO- <i>d</i> <sub>6</sub> ) spectrum of compound <b>6</b> ;                                     | S29    |
| Figure S12. <sup>13</sup> C NMR (125 MHz, DMSO- <i>d</i> <sub>6</sub> ) and DEPT spectra of compound <b>6</b> ;                            | S29    |
| Figure S13. <sup>1</sup> H- <sup>1</sup> H COSY spectrum of compound <b>6</b> ;                                                            | S30    |
| Figure S14. HSQC spectrum of compound <b>6</b> ;                                                                                           | S30    |
| Figure S15. HMBC spectrum of compound <b>6</b> ;                                                                                           | S31    |
| Figure S16. NOESY spectrum of compound <b>6</b> ;                                                                                          | S31    |
| Figure S17. HR-ESI-MS spectrum of compound <b>6</b> ;                                                                                      | S32    |
| Figure S18. ECD spectrum of compound <b>6</b> ;                                                                                            | S32    |
| Figure S19. <sup>1</sup> H-NMR (500 MHz, DMSO- <i>d</i> <sub>6</sub> ) spectrum of compound <b>7</b> ;                                     | S33    |
| Figure S20. <sup>13</sup> C NMR (125 MHz, DMSO- <i>d</i> <sub>6</sub> ) and DEPT spectra of compound <b>7</b> ;                            | S33    |
| Figure S21. <sup>1</sup> H- <sup>1</sup> H COSY spectrum of compound <b>7</b> ;                                                            | S34    |
| Figure S22. HSQC spectrum of compound <b>7</b> ;                                                                                           | S34    |
| Figure S23. HMBC spectrum of compound <b>7</b> ;                                                                                           | S35    |
| Figure S24. <i>J</i> -HMBC spectrum of compound <b>7</b> ;                                                                                 | S35    |
| Figure S25. HR-ESI-MS spectrum of compound <b>7</b> ;                                                                                      | S36    |
| Figure S26. ECD spectrum of compound <b>7</b> ;                                                                                            | S36    |
| Figure S27 Optimized geometries of predominant conformers (weighting factors) for <b>isomers 7a and 7b</b> at the B3LYP/6-311g(d,p) level. | S37    |
| Figure S28. <sup>1</sup> H-NMR (500 MHz, DMSO- <i>d</i> <sub>6</sub> ) spectrum of compound <b>10</b> ;                                    | S38    |
| Figure S29. <sup>13</sup> C NMR (125 MHz, DMSO- <i>d</i> <sub>6</sub> ) and DEPT spectra of compound <b>10</b> ;                           | S38    |

|                                                                                                        |     |
|--------------------------------------------------------------------------------------------------------|-----|
| Figure S30. $^1\text{H}$ - $^1\text{H}$ COSY spectrum of compound <b>10</b> ;                          | S39 |
| Figure S31. HSQC spectrum of compound <b>10</b> ;                                                      | S39 |
| Figure S32. HMBC spectrum of compound <b>10</b> ;                                                      | S40 |
| Figure S33. NOESY spectrum of compound <b>10</b> ;                                                     | S40 |
| Figure S34. HR-ESI-MS spectrum of compound <b>10</b> ;                                                 | S41 |
| Figure S35. $^1\text{H}$ -NMR (500 MHz, $\text{DMSO}-d_6$ ) spectrum of compound <b>11</b> ;           | S41 |
| Figure S36. $^{13}\text{C}$ NMR (125 MHz, $\text{DMSO}-d_6$ ) and DEPT spectra of compound <b>11</b> ; | S42 |
| Figure S37. $^1\text{H}$ - $^1\text{H}$ COSY spectrum of compound <b>11</b> ;                          | S42 |
| Figure S38. HSQC spectrum of compound <b>11</b> ;                                                      | S43 |
| Figure S39. HMBC spectrum of compound <b>11</b> ;                                                      | S43 |
| Figure S40. HR-ESI-MS spectrum of compound <b>11</b> ;                                                 | S44 |
| Figure S41. ECD spectrum of compound <b>11</b> ;                                                       | S44 |

**Table S1.** OR calculations of compound **10** (at 589.4 nm).

| Isomers                                                                                                                                                                | BH&HLYP/TZVP                                                          | CAM-3LYP/TZVP | PBE0/TZVP |
|------------------------------------------------------------------------------------------------------------------------------------------------------------------------|-----------------------------------------------------------------------|---------------|-----------|
| 3 <i>S</i> ,4 <i>S</i> ,5 <i>R</i> ,8 <i>R</i> ,9 <i>R</i> ,10 <i>R</i> ,12 <i>R</i> ,13 <i>R</i> ,14 <i>R</i> ,<br>17 <i>S</i> ,18 <i>S</i> ,21 <i>S</i> ,22 <i>S</i> | +44.8                                                                 | +46.7         | +50.9     |
| 3 <i>R</i> ,4 <i>R</i> ,5 <i>S</i> ,8 <i>S</i> ,9 <i>S</i> ,10 <i>S</i> ,12 <i>S</i> ,13 <i>S</i> ,14 <i>S</i> ,<br>17 <i>R</i> ,18 <i>R</i> ,21 <i>R</i> ,22 <i>R</i> | -44.8                                                                 | -46.7         | -50.9     |
| experimental OR values                                                                                                                                                 | [ $\alpha$ ] <sub>D</sub> <sup>25</sup> +30.0 ( <i>c</i> =0.20, MeOH) |               |           |

**Table S2.** The Cartesian coordinates of the lowest energy conformers (Conf. 1-8) for **isomer 1** of compounds **1a/1b**.

| Conf. 1-1 | X axis(Å) | Y axis(Å) | Z axis(Å) | Conf. 1-2 | X axis(Å) | Y axis(Å) | Z axis(Å) |
|-----------|-----------|-----------|-----------|-----------|-----------|-----------|-----------|
| C         | -1.676403 | -0.373761 | -0.131373 | C         | -1.596467 | -0.527839 | -0.223271 |
| C         | -1.790929 | 1.02724   | 0.048633  | C         | -1.746349 | 0.855987  | 0.044869  |
| C         | -3.019095 | -0.915174 | -0.065702 | C         | -2.920819 | -1.109862 | -0.173989 |
| C         | -3.892887 | 0.186574  | 0.143911  | C         | -3.818878 | -0.053807 | 0.114421  |
| N         | -3.129875 | 1.34415   | 0.224022  | N         | -3.091382 | 1.119991  | 0.257228  |
| C         | -3.564678 | -2.197763 | -0.1699   | C         | -3.43343  | -2.405414 | -0.353144 |
| C         | -4.944276 | -2.374357 | -0.070913 | C         | -4.798218 | -2.618884 | -0.246606 |
| C         | -5.791502 | -1.262375 | 0.134067  | C         | -5.678408 | -1.547028 | 0.039269  |
| C         | -5.2731   | 0.033123  | 0.245013  | C         | -5.202255 | -0.246475 | 0.225583  |
| C         | -0.656088 | 1.862528  | 0.029183  | C         | -0.636172 | 1.723747  | 0.060527  |
| N         | 0.554559  | 1.310434  | -0.158331 | N         | 0.586374  | 1.219581  | -0.176205 |
| C         | 0.674718  | -0.018887 | -0.340591 | C         | 0.74109   | -0.092784 | -0.442026 |
| C         | -0.405822 | -0.908183 | -0.339957 | C         | -0.313771 | -1.010853 | -0.482295 |
| C         | 2.038966  | -0.601259 | -0.604542 | C         | 2.116322  | -0.62049  | -0.763259 |
| N         | 3.155112  | 0.0303    | -0.13738  | N         | 3.225477  | 0.015391  | -0.285176 |
| O         | 2.142419  | -1.652245 | -1.25217  | O         | 2.233338  | -1.634528 | -1.464706 |
| C         | -0.806239 | 3.309864  | 0.254924  | C         | -0.823909 | 3.150455  | 0.373242  |
| O         | -7.151559 | -1.354022 | 0.240113  | O         | -6.997075 | -1.893547 | 0.115142  |
| C         | -7.766786 | -2.632863 | 0.1466    | C         | -7.955393 | -0.883129 | 0.397467  |
| C         | 4.451025  | -0.574305 | -0.450078 | C         | 4.534158  | -0.519696 | -0.669282 |
| C         | 5.464199  | 0.429048  | 0.148547  | C         | 5.525704  | 0.501498  | -0.064914 |
| C         | 4.70773   | 1.020987  | 1.348488  | C         | 4.790537  | 1.016591  | 1.182399  |
| C         | 3.263345  | 1.135496  | 0.838444  | C         | 3.324257  | 1.086765  | 0.728575  |
| C         | -0.060336 | 4.333948  | -0.213178 | C         | -0.113265 | 4.221242  | -0.042395 |
| C         | -0.389119 | 5.752756  | 0.185728  | C         | -0.476394 | 5.604495  | 0.44228   |
| C         | 1.112184  | 4.196463  | -1.149168 | C         | 1.050513  | 4.172357  | -0.998041 |
| C         | 4.598991  | -1.954117 | 0.198887  | C         | 4.816013  | -1.939108 | -0.16616  |
| O         | 5.368522  | -2.757719 | -0.562611 | O         | 4.156966  | -2.241429 | 0.970491  |
| C         | 5.603076  | -4.079938 | -0.044637 | C         | 4.36716   | -3.572129 | 1.477969  |
| O         | 4.155268  | -2.270015 | 1.283398  | O         | 5.611105  | -2.681897 | -0.703572 |

|   |           |           |           |   |           |           |           |
|---|-----------|-----------|-----------|---|-----------|-----------|-----------|
| H | -3.505085 | 2.279907  | 0.254432  | H | -3.493094 | 2.040524  | 0.35028   |
| H | -2.922791 | -3.060118 | -0.32979  | H | -2.76965  | -3.236377 | -0.576519 |
| H | -5.356588 | -3.372861 | -0.154079 | H | -5.226186 | -3.607155 | -0.380635 |
| H | -5.948555 | 0.86781   | 0.405971  | H | -5.864394 | 0.582805  | 0.447538  |
| H | -0.228536 | -1.964452 | -0.508727 | H | -0.110189 | -2.048233 | -0.723196 |
| H | -1.651997 | 3.574768  | 0.892779  | H | -1.668772 | 3.35319   | 1.034768  |
| H | -7.578581 | -3.096777 | -0.830235 | H | -7.773895 | -0.424904 | 1.378795  |
| H | -7.421429 | -3.302129 | 0.945115  | H | -7.954468 | -0.10577  | -0.378073 |
| H | -8.836995 | -2.45291  | 0.262142  | H | -8.923479 | -1.386637 | 0.40558   |
| H | 4.566882  | -0.697098 | -1.52946  | H | 4.617222  | -0.582676 | -1.757154 |
| H | 5.678478  | 1.204537  | -0.596924 | H | 5.678513  | 1.315074  | -0.784283 |
| H | 6.412441  | -0.045504 | 0.419187  | H | 6.501894  | 0.055918  | 0.147069  |
| H | 4.754265  | 0.332477  | 2.198719  | H | 4.899374  | 0.304342  | 2.007829  |
| H | 5.108514  | 1.98882   | 1.667867  | H | 5.160704  | 1.989096  | 1.523544  |
| H | 3.081568  | 2.094496  | 0.343389  | H | 3.085785  | 2.055284  | 0.278892  |
| H | 2.5216    | 1.025033  | 1.632116  | H | 2.616094  | 0.9171    | 1.542647  |
| H | 0.47002   | 6.225108  | 0.68348   | H | -0.730821 | 6.261692  | -0.401323 |
| H | -0.612122 | 6.367384  | -0.697979 | H | -1.322807 | 5.59295   | 1.137196  |
| H | -1.245285 | 5.805361  | 0.866611  | H | 0.376593  | 6.072949  | 0.954009  |
| H | 1.219158  | 3.185026  | -1.541301 | H | 0.924135  | 4.93087   | -1.783189 |
| H | 1.012332  | 4.905772  | -1.982654 | H | 1.985676  | 4.419208  | -0.474178 |
| H | 2.047414  | 4.454471  | -0.630835 | H | 1.176642  | 3.191165  | -1.455902 |
| H | 6.22906   | -4.574689 | -0.78791  | H | 3.7544    | -3.639001 | 2.37758   |
| H | 6.114663  | -4.028174 | 0.920568  | H | 4.04757   | -4.30921  | 0.736788  |
| H | 4.653948  | -4.608702 | 0.075186  | H | 5.423053  | -3.72956  | 1.714859  |

| Conf. 1-3 | X axis(Å) | Y axis(Å) | Z axis(Å) | Conf. 1-4 | X axis(Å) | Y axis(Å) | Z axis(Å) |
|-----------|-----------|-----------|-----------|-----------|-----------|-----------|-----------|
| C         | -1.765376 | -0.670228 | -0.144093 | C         | -1.637463 | -0.337534 | -0.185098 |
| C         | -1.78088  | 0.746893  | -0.13895  | C         | -1.693322 | 1.052297  | 0.085953  |
| C         | -3.145234 | -1.103783 | -0.079186 | C         | -2.999011 | -0.830435 | -0.125792 |
| C         | -3.937998 | 0.068469  | -0.030147 | C         | -3.82448  | 0.287992  | 0.172562  |
| N         | -3.099202 | 1.173667  | -0.082725 | N         | -3.014872 | 1.40796   | 0.310899  |
| C         | -3.78336  | -2.354841 | -0.047606 | C         | -3.596982 | -2.081337 | -0.302824 |
| C         | -5.165373 | -2.412871 | 0.03326   | C         | -4.980496 | -2.210677 | -0.187769 |
| C         | -5.938069 | -1.227338 | 0.084639  | C         | -5.77908  | -1.08283  | 0.106737  |
| C         | -5.336111 | 0.033478  | 0.052406  | C         | -5.20762  | 0.18156   | 0.291735  |
| C         | -0.586387 | 1.491288  | -0.179707 | C         | -0.527477 | 1.843828  | 0.091841  |
| N         | 0.586218  | 0.838318  | -0.235539 | N         | 0.656799  | 1.259883  | -0.157597 |
| C         | 0.617406  | -0.509013 | -0.233314 | C         | 0.721801  | -0.059062 | -0.425375 |
| C         | -0.528139 | -1.312622 | -0.183874 | C         | -0.393173 | -0.904723 | -0.455877 |
| C         | 1.943475  | -1.232995 | -0.250586 | C         | 2.054826  | -0.678547 | -0.759582 |
| N         | 3.061458  | -0.638729 | -0.764574 | N         | 3.211043  | -0.110969 | -0.307785 |

|   |           |           |           |   |           |           |           |
|---|-----------|-----------|-----------|---|-----------|-----------|-----------|
| O | 2.000445  | -2.389835 | 0.189198  | O | 2.094383  | -1.70727  | -1.448567 |
| C | -0.638664 | 2.963758  | -0.201149 | C | -0.618131 | 3.27939   | 0.408118  |
| O | -7.286829 | -1.42516  | 0.164944  | O | -7.139369 | -1.128889 | 0.234068  |
| C | -8.142172 | -0.292205 | 0.226296  | C | -7.807459 | -2.372868 | 0.063071  |
| C | 4.286689  | -1.43934  | -0.826605 | C | 4.474482  | -0.737578 | -0.704717 |
| C | 5.140681  | -0.713602 | -1.889589 | C | 5.542     | 0.224802  | -0.134385 |
| C | 4.71169   | 0.753807  | -1.745973 | C | 4.864868  | 0.80849   | 1.115655  |
| C | 3.208369  | 0.671433  | -1.436993 | C | 3.397975  | 0.967019  | 0.686576  |
| C | 0.22707   | 3.857094  | 0.324075  | C | 0.147664  | 4.303844  | -0.02571  |
| C | -0.01413  | 5.337844  | 0.152754  | C | -0.118211 | 5.707111  | 0.464514  |
| C | 1.459292  | 3.504943  | 1.116536  | C | 1.282679  | 4.182424  | -1.008958 |
| C | 5.033725  | -1.57328  | 0.504156  | C | 4.670624  | -2.164722 | -0.183361 |
| O | 4.641321  | -0.686711 | 1.43733   | O | 4.012428  | -2.405948 | 0.968355  |
| C | 5.292682  | -0.79697  | 2.716841  | C | 4.144043  | -3.739635 | 1.493896  |
| O | 5.922649  | -2.383617 | 0.673477  | O | 5.405775  | -2.966527 | -0.721349 |
| H | -3.39225  | 2.12872   | 0.057058  | H | -3.352435 | 2.353829  | 0.404852  |
| H | -3.202255 | -3.272473 | -0.083078 | H | -2.993026 | -2.955112 | -0.533076 |
| H | -5.688737 | -3.3632   | 0.061179  | H | -5.433968 | -3.1845   | -0.328976 |
| H | -5.915102 | 0.949433  | 0.086898  | H | -5.846445 | 1.029364  | 0.51968   |
| H | -0.421965 | -2.391335 | -0.165194 | H | -0.261363 | -1.952961 | -0.69964  |
| H | -1.514104 | 3.371269  | -0.711512 | H | -1.433324 | 3.534037  | 1.088576  |
| H | -7.933325 | 0.316695  | 1.115963  | H | -7.654208 | -2.773262 | -0.947336 |
| H | -8.047321 | 0.327901  | -0.675029 | H | -7.476364 | -3.109901 | 0.805986  |
| H | -9.1566   | -0.689538 | 0.288311  | H | -8.867388 | -2.159564 | 0.211575  |
| H | 4.050289  | -2.464773 | -1.121302 | H | 4.533589  | -0.822696 | -1.792649 |
| H | 4.870563  | -1.097233 | -2.880692 | H | 5.736171  | 1.01417   | -0.87056  |
| H | 6.2114    | -0.881497 | -1.745445 | H | 6.489867  | -0.281438 | 0.069718  |
| H | 5.240718  | 1.222391  | -0.907426 | H | 4.942328  | 0.105275  | 1.952288  |
| H | 4.914302  | 1.348525  | -2.642716 | H | 5.304285  | 1.760302  | 1.431963  |
| H | 2.605345  | 0.692052  | -2.354455 | H | 3.213994  | 1.942112  | 0.225664  |
| H | 2.858968  | 1.476471  | -0.79404  | H | 2.695603  | 0.856092  | 1.515538  |
| H | -0.915806 | 5.547156  | -0.432461 | H | -0.947539 | 5.747769  | 1.178594  |
| H | -0.112046 | 5.834915  | 1.128336  | H | 0.773581  | 6.122555  | 0.955427  |
| H | 0.837469  | 5.814266  | -0.353879 | H | -0.35132  | 6.378104  | -0.374385 |
| H | 1.486977  | 4.089986  | 2.046525  | H | 2.242683  | 4.385216  | -0.511772 |
| H | 1.516365  | 2.442528  | 1.354624  | H | 1.344277  | 3.191053  | -1.458072 |
| H | 2.366238  | 3.77188   | 0.554458  | H | 1.176508  | 4.938039  | -1.799897 |
| H | 4.836163  | -0.027416 | 3.339995  | H | 5.191332  | -3.962354 | 1.716174  |
| H | 5.121579  | -1.789719 | 3.140827  | H | 3.543875  | -3.752611 | 2.404334  |
| H | 6.368008  | -0.626714 | 2.614159  | H | 3.764435  | -4.465437 | 0.770062  |

| Conf. 1-5 | X axis(Å) | Y axis(Å) | Z axis(Å) | Conf. 1-6 | X axis(Å) | Y axis(Å) | Z axis(Å) |
|-----------|-----------|-----------|-----------|-----------|-----------|-----------|-----------|
|-----------|-----------|-----------|-----------|-----------|-----------|-----------|-----------|

|   |           |           |           |   |           |           |           |
|---|-----------|-----------|-----------|---|-----------|-----------|-----------|
| H | -3.264815 | 2.414911  | 0.07079   | C | -1.470631 | -0.508853 | -0.215524 |
| H | -3.383796 | -2.98483  | -0.090658 | C | -1.675403 | 0.8941    | -0.296546 |
| H | -5.840693 | -2.962732 | 0.047892  | C | -2.782021 | -1.114708 | -0.097329 |
| H | -5.885638 | 1.354783  | 0.097479  | C | -3.726521 | -0.051673 | -0.127439 |
| H | -0.561509 | -2.270405 | -0.168119 | N | -3.036029 | 1.146884  | -0.235612 |
| H | -1.318775 | 3.546486  | -0.692321 | C | -3.24785  | -2.427486 | 0.016325  |
| H | -7.893068 | -2.505228 | 1.07309   | C | -4.618221 | -2.672317 | 0.096859  |
| H | -9.176965 | -1.567098 | 0.258599  | C | -5.536314 | -1.598815 | 0.063128  |
| H | -7.996095 | -2.485762 | -0.717983 | C | -5.099069 | -0.273907 | -0.049527 |
| H | 3.89416   | -2.600589 | -1.136729 | C | -0.590995 | 1.774686  | -0.445254 |
| H | 4.785162  | -1.273767 | -2.893124 | N | 0.65098   | 1.274107  | -0.549808 |
| H | 6.142349  | -1.145456 | -1.764321 | C | 0.860056  | -0.053483 | -0.471126 |
| H | 5.307249  | 1.007708  | -0.909992 | C | -0.166756 | -0.991116 | -0.301049 |
| H | 4.975142  | 1.163404  | -2.641646 | C | 2.257527  | -0.593772 | -0.63187  |
| H | 2.631912  | 0.653957  | -2.335962 | N | 3.339444  | 0.212236  | -0.425691 |
| H | 2.948474  | 1.402271  | -0.769532 | O | 2.420159  | -1.776961 | -0.963369 |
| H | -0.598009 | 5.682987  | -0.406735 | C | -0.733567 | 3.243284  | -0.581956 |
| H | 0.218938  | 5.919525  | 1.155623  | O | -6.892261 | -1.757797 | 0.136599  |
| H | 1.16755   | 5.850518  | -0.325876 | C | -7.427863 | -3.069339 | 0.26316   |
| H | 2.577878  | 3.725434  | 0.579273  | C | 4.661634  | -0.37787  | -0.642027 |
| H | 1.713251  | 4.081687  | 2.071143  | C | 5.62233   | 0.817457  | -0.445477 |
| H | 1.654781  | 2.439432  | 1.369464  | C | 4.885656  | 1.698337  | 0.575572  |
| H | 4.865355  | -0.223676 | 3.325071  | C | 3.411452  | 1.566266  | 0.164624  |
| H | 5.026739  | -2.00155  | 3.125238  | C | -1.377175 | 4.096972  | 0.239602  |
| H | 6.346468  | -0.927812 | 2.587892  | C | -1.413106 | 5.575847  | -0.06658  |
| C | -1.801548 | -0.474365 | -0.139635 | C | -2.04099  | 3.702211  | 1.537535  |
| C | -1.736768 | 0.940929  | -0.12864  | C | 4.952741  | -1.489393 | 0.371128  |
| C | -3.205463 | -0.829125 | -0.077098 | O | 5.752864  | -2.429649 | -0.171418 |
| C | -3.932192 | 0.391744  | -0.023469 | C | 6.120231  | -3.518792 | 0.694657  |
| C | -3.911113 | -2.035279 | -0.05169  | O | 4.584122  | -1.499486 | 1.527313  |
| C | -5.303151 | -2.022225 | 0.027824  | H | -3.454688 | 2.057379  | -0.352503 |
| C | -6.001798 | -0.795388 | 0.083133  | H | -2.550565 | -3.260758 | 0.04135   |
| C | -5.321731 | 0.427873  | 0.056675  | H | -4.968832 | -3.693751 | 0.184036  |
| C | -0.500773 | 1.614892  | -0.167465 | H | -5.828051 | 0.530364  | -0.071935 |
| C | 0.586205  | -0.451232 | -0.229584 | H | 0.076739  | -2.047239 | -0.272269 |
| C | -0.604656 | -1.187262 | -0.18216  | H | -0.198502 | 3.658941  | -1.436027 |
| C | 1.867519  | -1.251463 | -0.252218 | H | -7.170306 | -3.691813 | -0.603418 |
| C | -0.467846 | 3.087771  | -0.184079 | H | -7.079373 | -3.555917 | 1.183229  |
| C | -8.137517 | -1.893479 | 0.195173  | H | -8.510719 | -2.941119 | 0.308314  |
| C | 4.192665  | -1.592761 | -0.837856 | H | 4.728545  | -0.81147  | -1.642499 |
| C | 5.082846  | -0.912769 | -1.901367 | H | 5.734735  | 1.342971  | -1.401585 |
| C | 4.743958  | 0.576921  | -1.746404 | H | 6.618136  | 0.504192  | -0.11708  |
| C | 3.240801  | 0.584555  | -1.42498  | H | 5.0323    | 1.304423  | 1.586876  |

|   |           |           |           |   |           |           |           |
|---|-----------|-----------|-----------|---|-----------|-----------|-----------|
| C | 0.446941  | 3.928573  | 0.34467   | H | 5.223942  | 2.739793  | 0.560458  |
| C | 0.289893  | 5.421155  | 0.178364  | H | 3.125868  | 2.317239  | -0.578884 |
| C | 1.656199  | 3.504742  | 1.137451  | H | 2.724931  | 1.657909  | 1.008198  |
| C | 4.937444  | -1.778243 | 0.487899  | H | -0.913123 | 5.810885  | -1.011553 |
| C | 5.262784  | -1.023138 | 2.699105  | H | -2.448196 | 5.941412  | -0.128838 |
| N | -3.027579 | 1.444759  | -0.070826 | H | -0.926899 | 6.152885  | 0.732714  |
| N | 0.632197  | 0.894992  | -0.226918 | H | -1.89603  | 2.649846  | 1.790983  |
| N | 3.017512  | -0.721323 | -0.765492 | H | -1.633837 | 4.306816  | 2.359803  |
| O | 1.856786  | -2.412398 | 0.180629  | H | -3.121874 | 3.907259  | 1.517265  |
| O | -7.363246 | -0.700667 | 0.163414  | H | 5.225199  | -4.050285 | 1.028252  |
| O | 4.610676  | -0.868781 | 1.424524  | H | 6.751929  | -4.169413 | 0.089053  |
| O | 5.77239   | -2.645372 | 0.650459  | H | 6.667964  | -3.147816 | 1.565528  |

| Conf. 1-7 | X axis(Å) | Y axis(Å) | Z axis(Å) | Conf. 1-8 | X axis(Å) | Y axis(Å) | Z axis(Å) |
|-----------|-----------|-----------|-----------|-----------|-----------|-----------|-----------|
| C         | -1.395718 | -0.66513  | -0.265514 | C         | -1.360962 | -0.611554 | -0.295913 |
| C         | -1.619821 | 0.737297  | -0.292669 | C         | -1.605685 | 0.741723  | 0.059711  |
| C         | -2.694959 | -1.291982 | -0.144581 | C         | -2.636428 | -1.293889 | -0.240552 |
| C         | -3.650664 | -0.246646 | -0.118523 | C         | -3.595735 | -0.331999 | 0.161119  |
| N         | -2.982398 | 0.966466  | -0.195647 | N         | -2.957022 | 0.887987  | 0.326103  |
| C         | -3.142405 | -2.6215   | -0.071493 | C         | -3.057185 | -2.612921 | -0.477706 |
| C         | -4.500451 | -2.879225 | 0.023038  | C         | -4.392661 | -2.942448 | -0.31154  |
| C         | -5.438535 | -1.818557 | 0.045197  | C         | -5.334069 | -1.965474 | 0.0945    |
| C         | -5.028445 | -0.484465 | -0.024785 | C         | -4.950642 | -0.643666 | 0.336931  |
| C         | -0.551122 | 1.63767   | -0.433188 | C         | -0.556649 | 1.673602  | 0.124019  |
| N         | 0.694809  | 1.159307  | -0.579944 | N         | 0.701627  | 1.260611  | -0.098814 |
| C         | 0.923943  | -0.167857 | -0.551215 | C         | 0.94821   | -0.017348 | -0.446191 |
| C         | -0.086357 | -1.124961 | -0.393625 | C         | -0.049534 | -0.991575 | -0.575341 |
| C         | 2.325231  | -0.685678 | -0.756167 | C         | 2.359096  | -0.4437   | -0.765108 |
| N         | 3.402936  | 0.133181  | -0.578776 | N         | 3.423963  | 0.294137  | -0.33502  |
| O         | 2.493936  | -1.866172 | -1.093376 | O         | 2.546884  | -1.472268 | -1.430194 |
| C         | -0.71823  | 3.107985  | -0.516797 | C         | -0.736577 | 3.093364  | 0.507484  |
| O         | -6.743256 | -2.209851 | 0.13954   | O         | -6.614445 | -2.422323 | 0.221914  |
| C         | -7.756656 | -1.214228 | 0.167817  | C         | -7.629659 | -1.512747 | 0.623063  |
| C         | 4.727762  | -0.430147 | -0.853514 | C         | 4.760038  | -0.154909 | -0.736305 |
| C         | 5.669786  | 0.787843  | -0.711782 | C         | 5.683161  | 0.977521  | -0.230104 |
| C         | 4.961044  | 1.665923  | 0.330503  | C         | 4.948111  | 1.507669  | 1.010248  |
| C         | 3.473177  | 1.497804  | -0.012781 | C         | 3.46723   | 1.432631  | 0.607598  |
| C         | -1.350048 | 3.923387  | 0.351378  | C         | -1.581197 | 3.999051  | -0.025806 |
| C         | -1.416618 | 5.41111   | 0.097527  | C         | -1.617713 | 5.415381  | 0.498198  |
| C         | -1.970304 | 3.473884  | 1.653183  | C         | -2.488923 | 3.736597  | -1.204054 |
| C         | 5.142291  | -1.57086  | 0.081162  | C         | 5.174115  | -1.513907 | -0.163104 |
| O         | 4.56014   | -1.503693 | 1.295342  | O         | 4.572163  | -1.803352 | 1.008167  |

|   |           |           |           |   |           |           |           |
|---|-----------|-----------|-----------|---|-----------|-----------|-----------|
| C | 4.898186  | -2.564034 | 2.208335  | C | 4.908657  | -3.079098 | 1.583835  |
| O | 5.968626  | -2.405144 | -0.225646 | O | 6.014786  | -2.218831 | -0.681962 |
| H | -3.415855 | 1.874133  | -0.275176 | H | -3.384397 | 1.736606  | 0.665359  |
| H | -2.433325 | -3.444762 | -0.090955 | H | -2.345008 | -3.372295 | -0.789351 |
| H | -4.87875  | -3.89481  | 0.080059  | H | -4.750217 | -3.951994 | -0.486897 |
| H | -5.735637 | 0.337093  | -0.008043 | H | -5.660741 | 0.114773  | 0.646591  |
| H | 0.172089  | -2.177795 | -0.408723 | H | 0.224415  | -1.996425 | -0.87648  |
| H | -0.214879 | 3.560258  | -1.371549 | H | -0.049538 | 3.43068   | 1.283815  |
| H | -7.64231  | -0.554149 | 1.037965  | H | -8.552718 | -2.093898 | 0.654719  |
| H | -7.752311 | -0.614916 | -0.752313 | H | -7.423774 | -1.099961 | 1.619617  |
| H | -8.701389 | -1.754972 | 0.244265  | H | -7.738723 | -0.693339 | -0.099843 |
| H | 4.758408  | -0.861542 | -1.857069 | H | 4.81217   | -0.276885 | -1.820969 |
| H | 5.725717  | 1.306337  | -1.676574 | H | 5.744923  | 1.754972  | -1.001067 |
| H | 6.685737  | 0.495842  | -0.430692 | H | 6.698979  | 0.625552  | -0.02852  |
| H | 5.161338  | 1.291302  | 1.340568  | H | 5.139952  | 0.857686  | 1.871305  |
| H | 5.275082  | 2.714146  | 0.289075  | H | 5.24778   | 2.525659  | 1.280464  |
| H | 3.14164   | 2.231794  | -0.754138 | H | 3.133503  | 2.348141  | 0.108951  |
| H | 2.820459  | 1.59186   | 0.856977  | H | 2.803331  | 1.25825   | 1.4566    |
| H | -0.91271  | 5.968143  | 0.900037  | H | -0.940979 | 5.556059  | 1.347019  |
| H | -0.950915 | 5.68542   | -0.854322 | H | -1.336392 | 6.130158  | -0.288002 |
| H | -2.458168 | 5.7629    | 0.081214  | H | -2.631879 | 5.69139   | 0.820946  |
| H | -1.548489 | 4.055932  | 2.484305  | H | -2.35316  | 2.743813  | -1.638348 |
| H | -3.054195 | 3.662825  | 1.67077   | H | -3.548547 | 3.853747  | -0.931208 |
| H | -1.802961 | 2.415587  | 1.865142  | H | -2.295801 | 4.478537  | -1.991165 |
| H | 4.606444  | -3.52876  | 1.785258  | H | 5.979974  | -3.132955 | 1.796506  |
| H | 5.972688  | -2.566707 | 2.411493  | H | 4.32744   | -3.143569 | 2.50433   |
| H | 4.332767  | -2.354742 | 3.11707   | H | 4.634319  | -3.883483 | 0.896452  |

**Table S3.** The Cartesian coordinates of the lowest energy conformers (Conf. 1-9) for **isomer 2** of compounds **1a/1b**.

| Conf. 2-1 | X axis(Å) | Y axis(Å) | Z axis(Å) | Conf. 2-2 | X axis(Å) | Y axis(Å) | Z axis(Å) |
|-----------|-----------|-----------|-----------|-----------|-----------|-----------|-----------|
| C         | 1.586476  | -0.563064 | -0.35575  | C         | -1.455546 | -0.981949 | -0.206204 |
| C         | 1.3086    | 0.821657  | -0.241286 | C         | -1.254865 | 0.395663  | 0.078442  |
| C         | 3.013634  | -0.720445 | -0.15817  | C         | -2.883587 | -1.213095 | -0.158752 |
| C         | 3.541274  | 0.581565  | 0.060333  | C         | -3.485914 | 0.02627   | 0.17041   |
| N         | 2.493943  | 1.493162  | 0.021673  | N         | -2.49019  | 0.982435  | 0.297911  |
| C         | 3.886692  | -1.811686 | -0.152391 | C         | -3.705114 | -2.336917 | -0.347746 |
| C         | 5.249317  | -1.607998 | 0.062455  | C         | -5.077537 | -2.209262 | -0.207185 |
| C         | 5.749383  | -0.303636 | 0.273632  | C         | -5.657942 | -0.961085 | 0.125953  |
| C         | 4.898135  | 0.807723  | 0.276051  | C         | -4.871162 | 0.177351  | 0.319714  |
| C         | 0.000145  | 1.317793  | -0.392271 | C         | 0.037429  | 0.94494   | 0.132513  |
| N         | -0.999176 | 0.452836  | -0.639824 | N         | 1.095545  | 0.130833  | -0.021729 |
| C         | -0.747599 | -0.864881 | -0.761176 | C         | 0.921796  | -1.175634 | -0.297668 |



|   |           |           |           |   |           |           |           |
|---|-----------|-----------|-----------|---|-----------|-----------|-----------|
| C | 0.528208  | -1.42637  | -0.632986 | C | -0.333616 | -1.781017 | -0.423265 |
| C | -1.872518 | -1.819483 | -1.090396 | C | 2.134715  | -2.040743 | -0.53176  |
| N | -3.168314 | -1.521776 | -0.768941 | N | 3.340897  | -1.687335 | 0.004447  |
| O | -1.604298 | -2.884349 | -1.659536 | O | 2.028527  | -3.070969 | -1.20864  |
| C | -0.26421  | 2.758768  | -0.237475 | C | 0.330799  | 2.363913  | 0.43493   |
| O | 7.070085  | -0.0228   | 0.489354  | O | -7.01897  | -0.973634 | 0.235675  |
| C | 8.008564  | -1.091226 | 0.512084  | C | -7.689874 | 0.233423  | 0.570415  |
| C | -3.691339 | -0.403114 | 0.016293  | C | 3.632363  | -0.659219 | 1.006626  |
| C | -5.223313 | -0.544625 | -0.15831  | C | 4.922215  | -1.193673 | 1.679173  |
| C | -5.429237 | -2.062568 | -0.27253  | C | 5.644535  | -1.923522 | 0.535979  |
| C | -4.201952 | -2.535973 | -1.062791 | C | 4.499145  | -2.563032 | -0.26117  |
| C | -1.179149 | 3.530013  | -0.862952 | C | -0.190506 | 3.464443  | -0.145856 |
| C | -1.29874  | 4.99521   | -0.518627 | C | 0.239721  | 4.840389  | 0.306117  |
| C | -2.127602 | 3.052079  | -1.93187  | C | -1.15464  | 3.453251  | -1.308688 |
| C | -3.289185 | -0.490799 | 1.492083  | C | 3.856509  | 0.750678  | 0.455332  |
| O | -3.566287 | 0.674537  | 2.119098  | O | 4.212193  | 0.766444  | -0.841021 |
| C | -3.246503 | 0.728121  | 3.521896  | C | 4.429904  | 2.066654  | -1.416827 |
| O | -2.810977 | -1.456177 | 2.047843  | O | 3.798006  | 1.743942  | 1.154649  |
| H | 2.603301  | 2.495953  | 0.022154  | H | -2.624541 | 1.938191  | 0.591664  |
| H | 3.51283   | -2.81893  | -0.316244 | H | -3.272648 | -3.300837 | -0.602419 |
| H | 5.917366  | -2.460909 | 0.063836  | H | -5.739757 | -3.057648 | -0.34682  |
| H | 5.311031  | 1.797583  | 0.445043  | H | -5.302403 | 1.139307  | 0.572784  |
| H | 0.655073  | -2.495488 | -0.759014 | H | -0.395852 | -2.835078 | -0.67007  |
| H | 0.386833  | 3.256747  | 0.484361  | H | 1.115493  | 2.499177  | 1.178414  |
| H | 7.783152  | -1.803996 | 1.315782  | H | -7.372059 | 0.606327  | 1.553125  |
| H | 8.038262  | -1.61826  | -0.450309 | H | -7.520228 | 1.007396  | -0.189884 |
| H | 8.97788   | -0.626565 | 0.700775  | H | -8.751544 | -0.016733 | 0.603079  |
| H | -3.323012 | 0.548456  | -0.362955 | H | 2.819222  | -0.565204 | 1.727172  |
| H | -5.515375 | -0.045625 | -1.090177 | H | 4.637528  | -1.902126 | 2.466429  |
| H | -5.779911 | -0.079885 | 0.660455  | H | 5.509285  | -0.395007 | 2.141692  |
| H | -5.435583 | -2.520162 | 0.723591  | H | 6.190853  | -1.207161 | -0.087775 |
| H | -6.368747 | -2.326138 | -0.768575 | H | 6.360743  | -2.668866 | 0.896055  |
| H | -4.38827  | -2.565894 | -2.144278 | H | 4.270364  | -3.580627 | 0.079402  |
| H | -3.846857 | -3.526001 | -0.765456 | H | 4.691825  | -2.616438 | -1.336826 |
| H | -0.593987 | 5.296961  | 0.263397  | H | 0.955662  | 4.793594  | 1.132283  |
| H | -1.121857 | 5.622782  | -1.403641 | H | 0.703614  | 5.397472  | -0.52028  |
| H | -2.314541 | 5.230164  | -0.169474 | H | -0.624711 | 5.435455  | 0.634903  |
| H | -2.114238 | 3.745753  | -2.784093 | H | -0.751636 | 4.065449  | -2.127398 |
| H | -1.893371 | 2.046136  | -2.28161  | H | -1.343807 | 2.451812  | -1.701238 |
| H | -3.160163 | 3.043877  | -1.552966 | H | -2.120121 | 3.908239  | -1.039842 |
| H | -3.814917 | -0.026285 | 4.072944  | H | 3.511498  | 2.657047  | -1.363015 |
| H | -2.177601 | 0.556133  | 3.672976  | H | 5.231371  | 2.591242  | -0.889115 |
| H | -3.525157 | 1.731993  | 3.843986  | H | 4.707068  | 1.880262  | -2.454918 |

| Conf. 2-3 | X axis(Å) | Y axis(Å) | Z axis(Å) | Conf. 2-4 | X axis(Å) | Y axis(Å) | Z axis(Å) |
|-----------|-----------|-----------|-----------|-----------|-----------|-----------|-----------|
| C         | 1.504331  | -0.796771 | 0.163582  | C         | 1.446663  | -0.769249 | -0.234139 |
| C         | 1.213248  | 0.562764  | -0.128208 | C         | 1.196129  | 0.620585  | -0.079914 |
| C         | 2.94589   | -0.934524 | 0.111049  | C         | 2.879387  | -0.949734 | -0.109713 |
| C         | 3.465536  | 0.344766  | -0.230177 | C         | 3.433185  | 0.337385  | 0.133896  |
| N         | 2.405294  | 1.229777  | -0.35812  | N         | 2.402387  | 1.265738  | 0.136465  |
| C         | 3.836069  | -1.994938 | 0.302939  | C         | 3.735669  | -2.053024 | -0.164473 |
| C         | 5.206587  | -1.784721 | 0.156209  | C         | 5.10642   | -1.876553 | 0.020431  |
| C         | 5.697581  | -0.504901 | -0.187408 | C         | 5.631578  | -0.587606 | 0.264526  |
| C         | 4.830296  | 0.575891  | -0.384315 | C         | 4.79859   | 0.535793  | 0.323205  |
| C         | -0.113341 | 1.024642  | -0.177851 | C         | -0.114091 | 1.126301  | -0.12323  |
| N         | -1.114475 | 0.14243   | -0.01326  | N         | -1.137546 | 0.26487   | -0.252192 |
| C         | -0.85422  | -1.147714 | 0.267887  | C         | -0.918662 | -1.053502 | -0.407532 |
| C         | 0.440191  | -1.667462 | 0.389253  | C         | 0.361578  | -1.623076 | -0.41844  |
| C         | -2.003554 | -2.093402 | 0.511529  | C         | -2.086252 | -2.000089 | -0.557367 |
| N         | -3.240607 | -1.816436 | 0.001691  | N         | -3.37334  | -1.539752 | -0.605954 |
| O         | -1.816665 | -3.122061 | 1.173641  | O         | -1.867511 | -3.216595 | -0.637179 |
| C         | -0.502467 | 2.418517  | -0.487695 | C         | -0.470022 | 2.552872  | 0.045479  |
| O         | 7.024716  | -0.220593 | -0.350695 | O         | 6.960942  | -0.334095 | 0.457934  |
| C         | 7.980744  | -1.257674 | -0.167653 | C         | 7.883371  | -1.416109 | 0.421714  |
| C         | -3.624009 | -0.795358 | -0.976161 | C         | -3.892622 | -0.16853  | -0.582337 |
| C         | -4.89205  | -1.404183 | -1.62664  | C         | -5.353138 | -0.34319  | -1.066978 |
| C         | -5.536224 | -2.195003 | -0.477296 | C         | -5.742389 | -1.732819 | -0.54275  |
| C         | -4.331576 | -2.77127  | 0.279455  | C         | -4.450846 | -2.546872 | -0.693899 |
| C         | -0.048877 | 3.556999  | 0.076605  | C         | 0.039621  | 3.623759  | -0.597439 |
| C         | -0.574472 | 4.896366  | -0.384215 | C         | -0.471333 | 5.011263  | -0.287941 |
| C         | 0.926471  | 3.622191  | 1.22807   | C         | 1.065818  | 3.560716  | -1.703986 |
| C         | -3.928143 | 0.588333  | -0.397301 | C         | -3.851899 | 0.517146  | 0.786283  |
| O         | -4.232765 | 0.565483  | 0.91181   | O         | -3.650179 | -0.335481 | 1.808442  |
| C         | -4.522044 | 1.840568  | 1.511839  | C         | -3.605724 | 0.253578  | 3.120419  |
| O         | -3.967963 | 1.590046  | -1.085568 | O         | -4.042237 | 1.709054  | 0.930301  |
| H         | 2.475233  | 2.190136  | -0.65908  | H         | 2.496711  | 2.247289  | 0.349549  |
| H         | 3.469211  | -2.983555 | 0.566228  | H         | 3.341969  | -3.049061 | -0.349348 |
| H         | 5.888139  | -2.613209 | 0.308076  | H         | 5.761145  | -2.738568 | -0.024744 |
| H         | 5.237099  | 1.547926  | -0.645826 | H         | 5.231199  | 1.513591  | 0.511682  |
| H         | 0.573674  | -2.714057 | 0.639424  | H         | 0.463732  | -2.695239 | -0.540695 |
| H         | -1.302608 | 2.495374  | -1.222951 | H         | -1.300755 | 2.718083  | 0.730621  |
| H         | 7.949423  | -1.653971 | 0.855438  | H         | 8.863562  | -0.972349 | 0.604332  |
| H         | 7.826398  | -2.074559 | -0.884336 | H         | 7.66533   | -2.153536 | 1.2049    |
| H         | 8.952974  | -0.795911 | -0.348121 | H         | 7.883532  | -1.908975 | -0.559046 |
| H         | -2.837123 | -0.636113 | -1.714173 | H         | -3.32751  | 0.483006  | -1.246892 |
| H         | -4.581117 | -2.082073 | -2.430774 | H         | -5.359871 | -0.332696 | -2.163605 |

|   |           |           |           |   |           |           |           |
|---|-----------|-----------|-----------|---|-----------|-----------|-----------|
| H | -5.540695 | -0.639254 | -2.063031 | H | -6.000754 | 0.466467  | -0.719146 |
| H | -6.109046 | -1.523465 | 0.172069  | H | -6.034824 | -1.674312 | 0.512276  |
| H | -6.213683 | -2.978969 | -0.830253 | H | -6.576314 | -2.176547 | -1.095831 |
| H | -4.045784 | -3.765709 | -0.085787 | H | -4.393086 | -3.060081 | -1.662448 |
| H | -4.492306 | -2.855701 | 1.35834   | H | -4.316988 | -3.305558 | 0.082126  |
| H | -1.293177 | 4.793429  | -1.202855 | H | -1.22618  | 5.001581  | 0.504173  |
| H | -1.06728  | 5.429468  | 0.441269  | H | 0.348585  | 5.672861  | 0.02727   |
| H | 0.245093  | 5.544566  | -0.72712  | H | -0.917301 | 5.471332  | -1.181022 |
| H | 1.183746  | 2.64006   | 1.630544  | H | 0.686134  | 4.091985  | -2.58769  |
| H | 1.857928  | 4.134272  | 0.942706  | H | 1.998601  | 4.072569  | -1.422373 |
| H | 0.494028  | 4.217808  | 2.043945  | H | 1.311426  | 2.540511  | -2.006556 |
| H | -5.380455 | 2.309367  | 1.022584  | H | -3.450741 | -0.579951 | 3.806103  |
| H | -4.743076 | 1.624246  | 2.557564  | H | -2.778046 | 0.964949  | 3.186265  |
| H | -3.652461 | 2.497803  | 1.429488  | H | -4.544364 | 0.769312  | 3.341002  |

| Conf. 2-5 | X axis(Å) | Y axis(Å) | Z axis(Å) | Conf. 2-6 | X axis(Å) | Y axis(Å) | Z axis(Å) |
|-----------|-----------|-----------|-----------|-----------|-----------|-----------|-----------|
| C         | 1.4918    | -1.015334 | 0.089939  | C         | 1.395828  | -0.955014 | -0.244773 |
| C         | 1.26692   | 0.364537  | -0.160026 | C         | 1.237812  | 0.450392  | -0.107289 |
| C         | 2.926328  | -1.209827 | 0.091866  | C         | 2.812316  | -1.228105 | -0.123885 |
| C         | 3.508758  | 0.054224  | -0.171722 | C         | 3.44962   | 0.017083  | 0.099514  |
| N         | 2.49385   | 0.9896    | -0.309169 | N         | 2.486294  | 1.014572  | 0.09494   |
| C         | 3.768246  | -2.318648 | 0.278598  | C         | 3.596538  | -2.392729 | -0.167788 |
| C         | 5.141516  | -2.152553 | 0.199123  | C         | 4.967491  | -2.298174 | 0.009188  |
| C         | 5.702125  | -0.880026 | -0.068772 | C         | 5.583255  | -1.043007 | 0.234821  |
| C         | 4.894346  | 0.244545  | -0.258262 | C         | 4.83393   | 0.13555   | 0.282873  |
| C         | -0.036139 | 0.880044  | -0.249146 | C         | -0.035698 | 1.041985  | -0.151181 |
| N         | -1.080744 | 0.041839  | -0.144649 | N         | -1.11487  | 0.250067  | -0.265825 |
| C         | -0.884897 | -1.268017 | 0.102764  | C         | -0.984264 | -1.082366 | -0.406259 |
| C         | 0.383547  | -1.845841 | 0.240998  | C         | 0.254245  | -1.736424 | -0.414821 |
| C         | -2.066957 | -2.19307  | 0.275617  | C         | -2.213091 | -1.950963 | -0.540919 |
| N         | -3.328479 | -1.80506  | -0.077255 | N         | -3.467922 | -1.407558 | -0.580849 |
| O         | -1.879732 | -3.325328 | 0.7396    | O         | -2.075702 | -3.179532 | -0.614478 |
| C         | -0.336816 | 2.30131   | -0.541154 | C         | -0.293942 | 2.491466  | 0.001343  |
| O         | 7.066438  | -0.85474  | -0.121762 | O         | 6.938439  | -1.091003 | 0.395605  |
| C         | 7.71828   | 0.3796    | -0.387013 | C         | 7.642818  | 0.11928   | 0.636484  |
| C         | -3.782578 | -0.590383 | -0.753388 | C         | -3.897195 | -0.005248 | -0.563111 |
| C         | -5.153701 | -1.016366 | -1.337262 | C         | -5.373586 | -0.089165 | -1.02355  |
| C         | -5.686365 | -2.011426 | -0.29502  | C         | -5.842543 | -1.44713  | -0.481826 |
| C         | -4.427919 | -2.763071 | 0.158678  | C         | -4.609298 | -2.343508 | -0.649829 |
| C         | 0.115182  | 3.394263  | 0.106687  | C         | 0.279711  | 3.516632  | -0.661659 |
| C         | -0.291792 | 4.777147  | -0.346111 | C         | -0.132707 | 4.939949  | -0.368038 |
| C         | 0.9788    | 3.36212   | 1.345192  | C         | 1.287249  | 3.368549  | -1.777324 |

|   |           |           |           |   |           |           |           |
|---|-----------|-----------|-----------|---|-----------|-----------|-----------|
| C | -3.9568   | 0.581675  | 0.215153  | C | -3.791563 | 0.689634  | 0.797146  |
| O | -4.014277 | 1.748465  | -0.467759 | O | -3.631488 | -0.164089 | 1.825606  |
| C | -4.23293  | 2.926639  | 0.327737  | C | -3.530898 | 0.433529  | 3.13054   |
| O | -4.105435 | 0.497308  | 1.414704  | O | -3.902066 | 1.892818  | 0.930941  |
| H | 2.615012  | 1.957767  | -0.565683 | H | 2.647066  | 1.990298  | 0.294718  |
| H | 3.350587  | -3.300613 | 0.484134  | H | 3.136208  | -3.362388 | -0.3377   |
| H | 5.819395  | -2.98845  | 0.338901  | H | 5.601462  | -3.178574 | -0.018716 |
| H | 5.310326  | 1.224808  | -0.461799 | H | 5.292276  | 1.103136  | 0.45321   |
| H | 0.461187  | -2.90676  | 0.449173  | H | 0.283755  | -2.814351 | -0.524727 |
| H | -1.046296 | 2.445264  | -1.35597  | H | -1.104398 | 2.720843  | 0.692406  |
| H | 7.432647  | 0.777571  | -1.369792 | H | 7.531272  | 0.819187  | -0.202317 |
| H | 7.495504  | 1.122627  | 0.390249  | H | 7.304018  | 0.599108  | 1.564267  |
| H | 8.786736  | 0.157862  | -0.381707 | H | 8.692151  | -0.163205 | 0.736031  |
| H | -3.088419 | -0.281205 | -1.533728 | H | -3.301759 | 0.602011  | -1.243017 |
| H | -4.983749 | -1.517128 | -2.298187 | H | -5.397699 | -0.086136 | -2.120004 |
| H | -5.81432  | -0.162589 | -1.514988 | H | -5.962395 | 0.762799  | -0.672221 |
| H | -6.131694 | -1.473599 | 0.549186  | H | -6.110335 | -1.362893 | 0.578004  |
| H | -6.445036 | -2.686424 | -0.703638 | H | -6.713566 | -1.839271 | -1.016361 |
| H | -4.248922 | -3.672891 | -0.428171 | H | -4.599778 | -2.861239 | -1.6177   |
| H | -4.450091 | -3.054377 | 1.212438  | H | -4.512568 | -3.107637 | 0.126257  |
| H | -0.922613 | 4.746268  | -1.240193 | H | -0.876477 | 4.993215  | 0.432727  |
| H | -0.841856 | 5.303882  | 0.44667   | H | 0.734049  | 5.549134  | -0.073008 |
| H | 0.590146  | 5.393318  | -0.572839 | H | -0.557769 | 5.41591   | -1.263    |
| H | 0.492811  | 3.931561  | 2.149516  | H | 2.254576  | 3.822803  | -1.513668 |
| H | 1.161227  | 2.350767  | 1.714537  | H | 1.461994  | 2.329671  | -2.065303 |
| H | 1.950271  | 3.849529  | 1.173228  | H | 0.933487  | 3.909247  | -2.666056 |
| H | -5.170383 | 2.84518   | 0.884905  | H | -4.42885  | 1.015337  | 3.356021  |
| H | -3.405831 | 3.065092  | 1.028999  | H | -3.425687 | -0.401817 | 3.823413  |
| H | -4.278688 | 3.752981  | -0.382844 | H | -2.655169 | 1.086395  | 3.179557  |

| Conf. 2-7 | X axis(Å) | Y axis(Å) | Z axis(Å) | Conf. 2-8 | X axis(Å) | Y axis(Å) | Z axis(Å) |
|-----------|-----------|-----------|-----------|-----------|-----------|-----------|-----------|
| H         | 2.457323  | 2.216578  | -0.605365 | C         | 1.694868  | -0.65506  | -0.101643 |
| H         | 3.547625  | -2.976239 | 0.446472  | C         | 1.364621  | 0.720132  | -0.040719 |
| H         | 5.962916  | -2.538369 | 0.270893  | C         | 3.140559  | -0.739999 | -0.037432 |
| H         | 5.234416  | 1.640256  | -0.539357 | C         | 3.623018  | 0.59492   | 0.054056  |
| H         | 0.643268  | -2.776872 | 0.451692  | N         | 2.533694  | 1.456571  | 0.065885  |
| H         | -1.231589 | 2.460769  | -1.348416 | C         | 4.062574  | -1.79019  | -0.05438  |
| H         | 7.986074  | -1.553714 | 0.9087    | C         | 5.427941  | -1.514979 | 0.013225  |
| H         | 7.916357  | -1.907949 | -0.848636 | C         | 5.881855  | -0.17978  | 0.099008  |
| H         | 8.997919  | -0.625435 | -0.234283 | C         | 4.981668  | 0.891998  | 0.121247  |
| H         | -3.072452 | -0.42115  | -1.522441 | C         | 0.027766  | 1.155166  | -0.090295 |
| H         | -4.869546 | -1.803613 | -2.275378 | N         | -0.952616 | 0.242156  | -0.202393 |

|   |           |           |           |   |           |           |           |
|---|-----------|-----------|-----------|---|-----------|-----------|-----------|
| H | -5.799689 | -0.496789 | -1.524185 | C | -0.654751 | -1.07377  | -0.258158 |
| H | -6.042172 | -1.789107 | 0.562241  | C | 0.652994  | -1.573841 | -0.208613 |
| H | -6.255844 | -3.044322 | -0.669185 | C | -1.753089 | -2.111779 | -0.326268 |
| H | -4.000252 | -3.868466 | -0.354878 | N | -3.070871 | -1.763647 | -0.431967 |
| H | -4.256071 | -3.228882 | 1.269973  | O | -1.445831 | -3.310925 | -0.27647  |
| H | -1.257515 | 4.766272  | -1.232634 | C | -0.276954 | 2.593291  | 0.04695   |
| H | -1.191573 | 5.331208  | 0.452583  | O | 7.20178   | 0.170073  | 0.167366  |
| H | 0.219419  | 5.508063  | -0.584679 | C | 8.189242  | -0.853391 | 0.155332  |
| H | 0.242246  | 4.046197  | 2.142488  | C | -3.69491  | -0.449693 | -0.589959 |
| H | 1.006136  | 2.511298  | 1.699868  | C | -5.101257 | -0.797153 | -1.135027 |
| H | 1.692064  | 4.057065  | 1.151371  | C | -5.418685 | -2.141449 | -0.463183 |
| H | -5.392772 | 2.594657  | 0.820842  | C | -4.062563 | -2.859348 | -0.440428 |
| H | -3.648442 | 2.929524  | 0.988153  | C | -1.1682   | 3.335014  | -0.641491 |
| H | -4.54083  | 3.539276  | -0.447286 | C | -1.375729 | 4.790426  | -0.301821 |
| C | 1.540781  | -0.823226 | 0.073698  | C | -2.016228 | 2.819728  | -1.77372  |
| C | 1.223767  | 0.537945  | -0.176549 | C | -3.802129 | 0.38658   | 0.688688  |
| C | 2.986364  | -0.924319 | 0.055493  | O | -3.488985 | -0.287114 | 1.807678  |
| C | 3.482787  | 0.37953   | -0.221036 | C | -3.551404 | 0.466948  | 3.032351  |
| C | 3.896999  | -1.969756 | 0.231699  | O | -4.186171 | 1.540768  | 0.678654  |
| C | 5.265306  | -1.721168 | 0.131664  | H | 2.588287  | 2.462523  | 0.007992  |
| C | 5.733285  | -0.417646 | -0.148446 | H | 3.724513  | -2.820919 | -0.121851 |
| C | 4.844887  | 0.649259  | -0.327327 | H | 6.1342    | -2.336502 | -0.001814 |
| C | -0.111706 | 0.966338  | -0.248654 | H | 5.359819  | 1.907331  | 0.191247  |
| C | -0.813383 | -1.231419 | 0.119251  | H | 0.808225  | -2.645723 | -0.245424 |
| C | 0.492693  | -1.724115 | 0.241819  | H | 0.312791  | 3.103216  | 0.81272   |
| C | -1.929275 | -2.231225 | 0.31158   | H | 9.148315  | -0.33673  | 0.220885  |
| C | -0.507461 | 2.364348  | -0.539462 | H | 8.078118  | -1.526359 | 1.015337  |
| C | 8.033077  | -1.116608 | -0.097009 | H | 8.151253  | -1.43484  | -0.774896 |
| C | -3.74863  | -0.765798 | -0.741085 | H | -3.13923  | 0.16814   | -1.292794 |
| C | -5.081827 | -1.298132 | -1.325372 | H | -5.035003 | -0.919439 | -2.222908 |
| C | -5.551312 | -2.308954 | -0.26784  | H | -5.82807  | -0.00737  | -0.927094 |
| C | -4.246574 | -2.960464 | 0.209902  | H | -5.783243 | -1.979276 | 0.558321  |
| C | -0.120863 | 3.48485   | 0.103547  | H | -6.179963 | -2.715739 | -1.000475 |
| C | -0.619282 | 4.838347  | -0.346179 | H | -3.906568 | -3.484424 | -1.328629 |
| C | 0.755595  | 3.508889  | 1.333101  | H | -3.920314 | -3.500172 | 0.43433   |
| C | -4.012173 | 0.406928  | 0.206306  | H | -0.73783  | 5.118375  | 0.525796  |
| C | -4.45356  | 2.728121  | 0.276726  | H | -1.173122 | 5.431633  | -1.171241 |
| N | 2.403934  | 1.243324  | -0.345008 | H | -2.422042 | 4.969466  | -0.017129 |
| N | -1.097846 | 0.061324  | -0.128493 | H | -3.060058 | 2.721991  | -1.446854 |
| N | -3.214711 | -1.93396  | -0.042033 | H | -2.002267 | 3.530877  | -2.611004 |
| O | -1.664524 | -3.341147 | 0.791775  | H | -1.679423 | 1.845783  | -2.13513  |
| O | 7.056851  | -0.095644 | -0.263998 | H | -3.267855 | -0.23447  | 3.817493  |
| O | -4.147691 | 1.554813  | -0.497149 | H | -2.851814 | 1.305947  | 2.991402  |

|   |           |          |          |   |           |          |          |
|---|-----------|----------|----------|---|-----------|----------|----------|
| O | -4.162588 | 0.332552 | 1.406273 | H | -4.563764 | 0.846094 | 3.196891 |
|---|-----------|----------|----------|---|-----------|----------|----------|

| Conf. 2-9 | X axis(Å) | Y axis(Å) | Z axis(Å) |
|-----------|-----------|-----------|-----------|
| C         | 1.657843  | -0.853364 | -0.115309 |
| C         | 1.415318  | 0.540647  | -0.060629 |
| C         | 3.093505  | -1.029907 | -0.049522 |
| C         | 3.658792  | 0.266081  | 0.036871  |
| N         | 2.630408  | 1.198747  | 0.043697  |
| C         | 3.95015   | -2.143102 | -0.060288 |
| C         | 5.320408  | -1.949221 | 0.009626  |
| C         | 5.86376   | -0.644151 | 0.091859  |
| C         | 5.040794  | 0.485231  | 0.107384  |
| C         | 0.109898  | 1.061643  | -0.113324 |
| N         | -0.927585 | 0.213755  | -0.220806 |
| C         | -0.714392 | -1.119445 | -0.270521 |
| C         | 0.557567  | -1.703185 | -0.21878  |
| C         | -1.877835 | -2.084505 | -0.333771 |
| N         | -3.17144  | -1.651583 | -0.425687 |
| O         | -1.648442 | -3.301023 | -0.289938 |
| C         | -0.099532 | 2.517469  | 0.015915  |
| O         | 7.227116  | -0.593634 | 0.154155  |
| C         | 7.86152   | 0.674839  | 0.239379  |
| C         | -3.711144 | -0.299435 | -0.575466 |
| C         | -5.147653 | -0.554939 | -1.093087 |
| C         | -5.538127 | -1.876521 | -0.415217 |
| C         | -4.231845 | -2.680924 | -0.422336 |
| C         | -0.946857 | 3.311332  | -0.670058 |
| C         | -1.056921 | 4.778836  | -0.336648 |
| C         | -1.83843  | 2.844974  | -1.789907 |
| C         | -3.738769 | 0.543705  | 0.702864  |
| O         | -3.465464 | -0.151794 | 1.819023  |
| C         | -3.458655 | 0.604079  | 3.044071  |
| O         | -4.034094 | 1.723767  | 0.696173  |
| H         | 2.750359  | 2.198769  | -0.018107 |
| H         | 3.546459  | -3.150031 | -0.124317 |
| H         | 6.009199  | -2.7879   | 0.002685  |
| H         | 5.442232  | 1.490104  | 0.173711  |
| H         | 0.643006  | -2.783019 | -0.251108 |
| H         | 0.52758   | 2.993375  | 0.773827  |
| H         | 7.639548  | 1.291321  | -0.641872 |
| H         | 7.559933  | 1.2109    | 1.149115  |
| H         | 8.932454  | 0.468811  | 0.277784  |

|   |           |           |           |
|---|-----------|-----------|-----------|
| H | -3.129582 | 0.279657  | -1.290287 |
| H | -5.110497 | -0.680011 | -2.182044 |
| H | -5.81793  | 0.279915  | -0.871418 |
| H | -5.868465 | -1.692685 | 0.614183  |
| H | -6.346932 | -2.398786 | -0.935949 |
| H | -4.133633 | -3.30856  | -1.317109 |
| H | -4.115193 | -3.335866 | 0.445657  |
| H | -0.391269 | 5.068912  | 0.483238  |
| H | -0.822062 | 5.401505  | -1.211389 |
| H | -2.086684 | 5.02617   | -0.042867 |
| H | -1.804046 | 3.558706  | -2.624234 |
| H | -1.556658 | 1.857186  | -2.161011 |
| H | -2.879582 | 2.796619  | -1.444114 |
| H | -3.219097 | -0.116803 | 3.826246  |
| H | -2.699629 | 1.389259  | 2.995431  |
| H | -4.438492 | 1.05668   | 3.219591  |

**Table S4.** The Cartesian coordinates of the lowest energy conformers (conf. 1-10) for **isomers 7b** of compound **7**.

| Conf. 7b-1 | X axis(Å) | Y axis(Å) | Z axis(Å) | Conf. 7b-2 | X axis(Å) | Y axis(Å) | Z axis(Å) |
|------------|-----------|-----------|-----------|------------|-----------|-----------|-----------|
| C          | -0.550206 | -1.367952 | 0.001552  | C          | -0.342031 | -1.418887 | -0.004794 |
| C          | 0.685425  | -0.461672 | 0.225255  | C          | 0.80781   | -0.408873 | 0.230532  |
| C          | 1.923224  | -1.406185 | -0.066051 | C          | 2.126255  | -1.242413 | -0.044972 |
| N          | 1.334626  | -2.505663 | -0.792448 | N          | 1.643227  | -2.397374 | -0.762084 |
| C          | -0.02657  | -2.504494 | -0.899498 | C          | 0.288473  | -2.511605 | -0.890521 |
| O          | 0.727014  | 0.161338  | 1.477744  | O          | 0.781042  | 0.214328  | 1.483876  |
| C          | 3.066183  | -0.799305 | -0.954762 | C          | 3.224302  | -0.553372 | -0.931382 |
| C          | 3.846605  | 0.393572  | -0.525188 | C          | 3.881193  | 0.719253  | -0.524989 |
| O          | 3.314576  | -1.368507 | -2.011859 | O          | 3.54989   | -1.129617 | -1.963499 |
| C          | 3.675494  | 1.037021  | 0.713607  | C          | 3.613093  | 1.387721  | 0.682883  |
| C          | 4.454387  | 2.150162  | 1.036199  | C          | 4.278364  | 2.577559  | 0.985344  |
| C          | 5.405754  | 2.63142   | 0.133934  | C          | 5.212831  | 3.11008   | 0.094194  |
| C          | 5.581112  | 1.997465  | -1.102784 | C          | 5.484545  | 2.451152  | -1.111661 |
| C          | 4.809538  | 0.887155  | -1.429373 | C          | 4.825312  | 1.265425  | -1.418663 |
| O          | -0.708417 | -3.230942 | -1.595906 | O          | -0.318715 | -3.297802 | -1.590881 |
| O          | -1.607495 | -0.69856  | -0.697611 | O          | -1.44141  | -0.842291 | -0.720686 |
| C          | -2.780457 | -0.945953 | -0.032489 | C          | -2.599243 | -1.183917 | -0.070058 |
| C          | -2.642562 | -1.626797 | 1.133179  | C          | -2.420986 | -1.848194 | 1.099687  |
| C          | -1.220571 | -1.8917   | 1.291147  | C          | -0.983943 | -1.995311 | 1.276863  |
| O          | -0.620047 | -2.404954 | 2.226115  | O          | -0.35572  | -2.459229 | 2.219201  |
| C          | -3.673942 | -2.042653 | 2.134402  | C          | -3.428013 | -2.344011 | 2.08917   |
| C          | -3.985331 | -0.441635 | -0.763149 | C          | -3.830553 | -0.775145 | -0.81654  |
| C          | -3.993859 | 1.101905  | -0.956768 | C          | -3.976722 | 0.767176  | -0.971833 |

|   |           |           |           |   |           |           |           |
|---|-----------|-----------|-----------|---|-----------|-----------|-----------|
| O | -5.109533 | 1.429958  | -1.781516 | O | -5.087961 | 1.013779  | -1.829632 |
| C | -4.152782 | 1.826621  | 0.349383  | C | -4.249967 | 1.434159  | 0.345891  |
| C | -3.250772 | 2.604459  | 0.965307  | C | -3.437906 | 2.254079  | 1.028482  |
| C | -1.86678  | 2.986624  | 0.511858  | C | -2.058947 | 2.740741  | 0.665988  |
| C | -1.637337 | 4.510282  | 0.552633  | C | -1.893733 | 4.264244  | 0.847418  |
| O | -4.093722 | -1.079865 | -2.044717 | O | -3.852786 | -1.385643 | -2.115408 |
| C | -0.215549 | 4.907792  | 0.140318  | C | -2.747767 | 5.097774  | -0.115069 |
| O | 2.441778  | -1.76954  | 1.202973  | O | 2.669413  | -1.541949 | 1.231594  |
| C | 3.325396  | -2.891894 | 1.237232  | C | 3.618925  | -2.608432 | 1.292968  |
| H | 0.654454  | 0.334964  | -0.52392  | H | 0.714429  | 0.382928  | -0.518617 |
| H | 1.885264  | -2.998782 | -1.488967 | H | 2.245097  | -2.848322 | -1.444902 |
| H | 0.836643  | -0.541928 | 2.146163  | H | 0.966561  | -0.47406  | 2.151114  |
| H | 2.936607  | 0.6778    | 1.417609  | H | 2.886911  | 0.98856   | 1.379077  |
| H | 4.315198  | 2.640738  | 1.995774  | H | 4.064834  | 3.086938  | 1.921154  |
| H | 6.00926   | 3.498519  | 0.390522  | H | 5.728617  | 4.036122  | 0.335677  |
| H | 6.318479  | 2.371257  | -1.808126 | H | 6.209079  | 2.864245  | -1.808322 |
| H | 4.934295  | 0.384893  | -2.38319  | H | 5.025334  | 0.743574  | -2.348852 |
| H | -3.583918 | -3.112673 | 2.353812  | H | -3.346219 | -1.795411 | 3.035391  |
| H | -3.534956 | -1.507074 | 3.081408  | H | -4.451487 | -2.233788 | 1.719822  |
| H | -4.689891 | -1.848048 | 1.77923   | H | -3.253703 | -3.402306 | 2.314597  |
| H | -4.888499 | -0.7227   | -0.214893 | H | -4.71529  | -1.151822 | -0.296264 |
| H | -3.059972 | 1.385385  | -1.460059 | H | -3.055821 | 1.150733  | -1.431159 |
| H | -5.120543 | 0.779741  | -2.507712 | H | -5.016484 | 0.379991  | -2.566903 |
| H | -5.126282 | 1.680463  | 0.818444  | H | -5.229734 | 1.19839   | 0.762447  |
| H | -3.547683 | 3.037587  | 1.922856  | H | -3.810522 | 2.629011  | 1.984657  |
| H | -1.66651  | 2.615026  | -0.500184 | H | -1.804349 | 2.467928  | -0.365797 |
| H | -1.12819  | 2.501621  | 1.169016  | H | -1.325725 | 2.229853  | 1.308055  |
| H | -1.841855 | 4.877923  | 1.568439  | H | -0.833675 | 4.517035  | 0.71066   |
| H | -2.366724 | 5.001523  | -0.105447 | H | -2.140222 | 4.530752  | 1.885681  |
| H | -3.20172  | -1.257928 | -2.390527 | H | -2.940926 | -1.475712 | -2.442865 |
| H | -0.078403 | 5.994815  | 0.18536   | H | -2.593223 | 6.171093  | 0.048661  |
| H | 0.004596  | 4.587783  | -0.886235 | H | -3.816385 | 4.888182  | 0.011335  |
| H | 0.532234  | 4.447798  | 0.798964  | H | -2.491828 | 4.879038  | -1.159884 |
| H | 3.611944  | -3.007963 | 2.283693  | H | 3.160197  | -3.557521 | 0.995074  |
| H | 2.817489  | -3.800885 | 0.896453  | H | 4.497672  | -2.405056 | 0.666292  |
| H | 4.224663  | -2.717075 | 0.631215  | H | 3.926508  | -2.666578 | 2.338303  |

| Conf. 7b-3 | X axis(Å) | Y axis(Å) | Z axis(Å) | Conf. 7b-4 | X axis(Å) | Y axis(Å) | Z axis(Å) |
|------------|-----------|-----------|-----------|------------|-----------|-----------|-----------|
| C          | -0.556883 | -1.307173 | 0.034634  | C          | -0.42893  | -1.402044 | 0.063282  |
| C          | 0.692105  | -0.412214 | 0.223735  | C          | 0.757668  | -0.421316 | 0.230317  |
| C          | 1.914565  | -1.380032 | -0.05855  | C          | 2.043801  | -1.321965 | 0.020546  |
| N          | 1.304093  | -2.486581 | -0.756394 | N          | 1.518358  | -2.503334 | -0.620624 |



|   |           |           |           |   |           |           |           |
|---|-----------|-----------|-----------|---|-----------|-----------|-----------|
| C | -0.057517 | -2.46867  | -0.84896  | C | 0.160545  | -2.574733 | -0.744974 |
| O | 0.755735  | 0.239175  | 1.460224  | O | 0.75251   | 0.291917  | 1.434614  |
| C | 3.055741  | -0.806386 | -0.970988 | C | 3.168689  | -0.734767 | -0.903684 |
| C | 3.862493  | 0.378407  | -0.568642 | C | 3.868442  | 0.53881   | -0.580208 |
| O | 3.279382  | -1.394112 | -2.023469 | O | 3.475921  | -1.389301 | -1.893914 |
| C | 3.720912  | 1.041419  | 0.663651  | C | 3.63217   | 1.287624  | 0.586564  |
| C | 4.524738  | 2.14407   | 0.960013  | C | 4.336841  | 2.472045  | 0.811157  |
| C | 5.471286  | 2.596032  | 0.037773  | C | 5.27857   | 2.920383  | -0.117802 |
| C | 5.616929  | 1.942859  | -1.192787 | C | 5.518652  | 2.181283  | -1.283204 |
| C | 4.820891  | 0.842509  | -1.493128 | C | 4.820897  | 0.999903  | -1.512175 |
| O | -0.757271 | -3.197392 | -1.525348 | O | -0.475989 | -3.382088 | -1.393702 |
| O | -1.615755 | -0.645769 | -0.669812 | O | -1.508846 | -0.839416 | -0.692387 |
| C | -2.786786 | -0.886991 | 0.001432  | C | -2.676434 | -1.096385 | -0.021139 |
| C | -2.642501 | -1.538158 | 1.183467  | C | -2.519512 | -1.681952 | 1.192993  |
| C | -1.219121 | -1.795708 | 1.341907  | C | -1.088203 | -1.863551 | 1.382159  |
| O | -0.613624 | -2.285837 | 2.286057  | O | -0.474545 | -2.278384 | 2.356587  |
| C | -3.669253 | -1.940511 | 2.194935  | C | -3.541169 | -2.074828 | 2.213292  |
| C | -3.998292 | -0.432713 | -0.750874 | C | -3.896278 | -0.714423 | -0.799899 |
| C | -4.044165 | 1.098853  | -1.009146 | C | -3.967051 | 0.801055  | -1.143793 |
| O | -5.151197 | 1.358507  | -1.872495 | O | -5.087462 | 0.998968  | -2.003202 |
| C | -4.253693 | 1.871484  | 0.262375  | C | -4.169815 | 1.641863  | 0.084165  |
| C | -3.53345  | 2.909283  | 0.711973  | C | -3.308723 | 2.51221   | 0.632323  |
| C | -2.341388 | 3.577936  | 0.082338  | C | -1.932325 | 2.895291  | 0.15552   |
| C | -1.114323 | 3.628557  | 1.014473  | C | -1.743878 | 4.417865  | -0.036295 |
| O | -4.086183 | -1.126878 | -2.005106 | O | -3.970049 | -1.479054 | -2.013439 |
| C | 0.05895   | 4.402911  | 0.403106  | C | -1.811568 | 5.238652  | 1.258097  |
| O | 2.439129  | -1.724375 | 1.212625  | O | 2.570195  | -1.555698 | 1.317169  |
| C | 3.315676  | -2.851655 | 1.260142  | C | 3.484886  | -2.645262 | 1.453582  |
| H | 0.663403  | 0.366747  | -0.544052 | H | 0.696635  | 0.31697   | -0.574689 |
| H | 1.839983  | -2.999475 | -1.450138 | H | 2.103299  | -3.022313 | -1.268872 |
| H | 0.854798  | -0.449736 | 2.145102  | H | 0.897805  | -0.35366  | 2.152603  |
| H | 2.985659  | 0.705719  | 1.382877  | H | 2.899924  | 0.955533  | 1.310949  |
| H | 4.408527  | 2.649696  | 1.914804  | H | 4.147889  | 3.043602  | 1.715832  |
| H | 6.094062  | 3.455248  | 0.27399   | H | 5.824589  | 3.842979  | 0.062707  |
| H | 6.350429  | 2.293803  | -1.913724 | H | 6.24872   | 2.528618  | -2.00936  |
| H | 4.92278   | 0.325147  | -2.441572 | H | 4.996033  | 0.416075  | -2.409978 |
| H | -3.574456 | -3.006252 | 2.432536  | H | -3.405935 | -3.12228  | 2.506229  |
| H | -3.529248 | -1.388558 | 3.132316  | H | -3.435092 | -1.470321 | 3.122295  |
| H | -4.687077 | -1.756114 | 1.839658  | H | -4.56119  | -1.950922 | 1.838728  |
| H | -4.896963 | -0.711618 | -0.193548 | H | -4.790664 | -0.978057 | -0.22906  |
| H | -3.108564 | 1.391258  | -1.503447 | H | -3.041434 | 1.07358   | -1.667515 |
| H | -5.129933 | 0.671399  | -2.564252 | H | -5.064328 | 0.279038  | -2.66003  |
| H | -5.120185 | 1.552497  | 0.843037  | H | -5.14396  | 1.502813  | 0.55426   |

|   |           |           |           |   |           |           |           |
|---|-----------|-----------|-----------|---|-----------|-----------|-----------|
| H | -3.851194 | 3.354336  | 1.657349  | H | -3.640537 | 3.016285  | 1.540543  |
| H | -2.625971 | 4.611385  | -0.172819 | H | -1.697773 | 2.389128  | -0.78726  |
| H | -2.066464 | 3.095222  | -0.862589 | H | -1.190413 | 2.539459  | 0.887498  |
| H | -0.797308 | 2.606634  | 1.258138  | H | -2.495328 | 4.785502  | -0.748121 |
| H | -1.404771 | 4.09687   | 1.966095  | H | -0.764768 | 4.579055  | -0.507892 |
| H | -3.189873 | -1.331242 | -2.324244 | H | -3.069557 | -1.651985 | -2.339372 |
| H | 0.920445  | 4.417047  | 1.080949  | H | -1.609982 | 6.297837  | 1.058245  |
| H | -0.217833 | 5.443797  | 0.190459  | H | -1.068078 | 4.889582  | 1.986716  |
| H | 0.387534  | 3.948866  | -0.540743 | H | -2.797848 | 5.179942  | 1.733008  |
| H | 2.79996   | -3.763056 | 0.937887  | H | 3.783421  | -2.647055 | 2.503156  |
| H | 4.212048  | -2.692638 | 0.645505  | H | 2.998638  | -3.596719 | 1.211999  |
| H | 3.608351  | -2.952131 | 2.306508  | H | 4.37389   | -2.509456 | 0.822996  |

| Conf. 7b-5 | X axis(Å) | Y axis(Å) | Z axis(Å) | Conf. 7b-6 | X axis(Å) | Y axis(Å) | Z axis(Å) |
|------------|-----------|-----------|-----------|------------|-----------|-----------|-----------|
| C          | 0.016569  | -0.963154 | 0.236229  | C          | -0.131879 | -0.851656 | 0.23948   |
| C          | -1.374853 | -0.655633 | -0.36984  | C          | -1.547428 | -0.583513 | -0.327839 |
| C          | -2.265177 | -0.246597 | 0.87571   | C          | -2.367963 | -0.026636 | 0.907917  |
| N          | -1.288345 | 0.046468  | 1.895454  | N          | -1.337578 | 0.353812  | 1.842216  |
| C          | 0.014889  | -0.22291  | 1.588011  | C          | -0.05521  | 0.029489  | 1.502042  |
| O          | -1.912805 | -1.695657 | -1.136027 | O          | -2.138615 | -1.687712 | -0.95156  |
| C          | -3.177218 | 1.018928  | 0.706666  | C          | -3.268382 | 1.231255  | 0.646259  |
| C          | -4.253375 | 1.082015  | -0.320879 | C          | -4.390934 | 1.20555   | -0.332033 |
| O          | -2.996042 | 1.947727  | 1.486885  | O          | -3.035642 | 2.234989  | 1.311571  |
| C          | -4.546898 | 0.033898  | -1.211297 | C          | -4.756296 | 0.068054  | -1.073737 |
| C          | -5.572649 | 0.179945  | -2.147688 | C          | -5.82328  | 0.133602  | -1.972348 |
| C          | -6.314133 | 1.362162  | -2.204467 | C          | -6.534305 | 1.32415   | -2.138905 |
| C          | -6.02766  | 2.410955  | -1.32118  | C          | -6.176083 | 2.461801  | -1.404257 |
| C          | -5.006035 | 2.27243   | -0.387294 | C          | -5.113853 | 2.403172  | -0.508042 |
| O          | 0.996148  | 0.088336  | 2.235831  | O          | 0.961311  | 0.390196  | 2.064169  |
| O          | 1.089334  | -0.443038 | -0.556476 | O          | 0.907145  | -0.441745 | -0.655835 |
| C          | 2.023896  | -1.430399 | -0.705056 | C          | 1.821649  | -1.455808 | -0.736476 |
| C          | 1.666291  | -2.640589 | -0.198445 | C          | 1.472565  | -2.596538 | -0.083768 |
| C          | 0.347001  | -2.464759 | 0.383134  | C          | 0.184538  | -2.334133 | 0.534218  |
| O          | -0.407219 | -3.288454 | 0.888751  | O          | -0.555574 | -3.083842 | 1.161328  |
| C          | 2.397559  | -3.950694 | -0.192584 | C          | 2.186581  | -3.910582 | 0.035884  |
| C          | 3.272477  | -0.922957 | -1.383601 | C          | 3.044927  | -1.045857 | -1.519317 |
| C          | 4.177052  | -0.197008 | -0.34614  | C          | 3.986913  | -0.203451 | -0.611186 |
| O          | 4.815175  | -1.280595 | 0.368691  | O          | 4.63757   | -1.195051 | 0.215225  |
| C          | 5.196896  | 0.690786  | -1.002348 | C          | 4.995793  | 0.583116  | -1.399863 |
| C          | 5.466648  | 1.966474  | -0.679698 | C          | 5.221253  | 1.904046  | -1.312213 |
| C          | 4.821789  | 2.833898  | 0.368632  | C          | 4.532253  | 2.930223  | -0.450086 |
| C          | 4.12712   | 4.073053  | -0.233925 | C          | 5.516305  | 3.764787  | 0.398458  |

|   |           |           |           |   |           |           |           |
|---|-----------|-----------|-----------|---|-----------|-----------|-----------|
| O | 3.984017  | -1.937539 | -2.060962 | O | 3.728567  | -2.141884 | -2.090206 |
| C | 3.54524   | 5.003131  | 0.836487  | C | 6.243172  | 2.954054  | 1.477533  |
| O | -3.078049 | -1.374549 | 1.162378  | O | -3.182893 | -1.100507 | 1.353823  |
| C | -3.665564 | -1.4294   | 2.462818  | C | -3.699355 | -1.005959 | 2.681911  |
| H | -1.266854 | 0.20542   | -1.03623  | H | -1.460294 | 0.199691  | -1.086921 |
| H | -1.498744 | 0.738139  | 2.608458  | H | -1.502477 | 1.121801  | 2.485736  |
| H | -2.065988 | -2.448181 | -0.532762 | H | -2.271122 | -2.36971  | -0.265325 |
| H | -3.974118 | -0.884362 | -1.183533 | H | -4.20795  | -0.858224 | -0.959571 |
| H | -5.790408 | -0.634457 | -2.83336  | H | -6.097142 | -0.75006  | -2.542397 |
| H | -7.112497 | 1.469379  | -2.934656 | H | -7.364743 | 1.368677  | -2.839211 |
| H | -6.601267 | 3.333041  | -1.364167 | H | -6.725599 | 3.390489  | -1.533383 |
| H | -4.771453 | 3.076278  | 0.302943  | H | -4.823671 | 3.275987  | 0.067815  |
| H | 3.320564  | -3.890282 | 0.395706  | H | 3.125282  | -3.805052 | 0.592353  |
| H | 1.75653   | -4.712412 | 0.262268  | H | 1.54816   | -4.612205 | 0.581954  |
| H | 2.65821   | -4.276375 | -1.204742 | H | 2.416831  | -4.340618 | -0.943987 |
| H | 2.957097  | -0.190578 | -2.134887 | H | 2.704532  | -0.410435 | -2.344258 |
| H | 3.53494   | 0.36209   | 0.341393  | H | 3.368974  | 0.446106  | 0.016082  |
| H | 5.539878  | -0.916458 | 0.900112  | H | 5.348626  | -0.765614 | 0.715408  |
| H | 5.767475  | 0.218274  | -1.801581 | H | 5.592624  | -0.007664 | -2.094506 |
| H | 6.250043  | 2.463222  | -1.25619  | H | 6.005769  | 2.311691  | -1.954198 |
| H | 5.60384   | 3.180186  | 1.062586  | H | 3.785621  | 2.46911   | 0.206443  |
| H | 4.099649  | 2.272117  | 0.972053  | H | 3.980205  | 3.616015  | -1.110777 |
| H | 3.329408  | 3.741028  | -0.911854 | H | 4.95621   | 4.581941  | 0.871561  |
| H | 4.847686  | 4.62647   | -0.852938 | H | 6.252733  | 4.239592  | -0.265927 |
| H | 4.580661  | -2.342884 | -1.405082 | H | 4.342179  | -2.473223 | -1.409159 |
| H | 3.053776  | 5.871305  | 0.38168   | H | 6.914099  | 3.591602  | 2.065318  |
| H | 4.329861  | 5.376832  | 1.506916  | H | 6.848615  | 2.152568  | 1.036574  |
| H | 2.801057  | 4.482797  | 1.452198  | H | 5.528918  | 2.493546  | 2.172557  |
| H | -4.252418 | -2.349312 | 2.480458  | H | -4.305128 | -1.902367 | 2.824912  |
| H | -2.893956 | -1.47546  | 3.239259  | H | -2.887681 | -0.994433 | 3.417715  |
| H | -4.32823  | -0.572377 | 2.645732  | H | -4.331352 | -0.116437 | 2.809783  |

Table S5 DP4+ probability analysis of compound 1a.

| Functional<br>mPW1PW91 |      | Solvent?<br>PCM | Basis Set<br>6-31+G (d, p) |           | Type of Data<br>Shielding Tensors |          |          |
|------------------------|------|-----------------|----------------------------|-----------|-----------------------------------|----------|----------|
|                        |      | DP4+            | 100.00%                    | 0.00%     | –                                 | –        | –        |
| Nuclei                 | sp2? | Experiment      | Isomer 1                   | Isomer 2  | Isomer 3                          | Isomer 4 | Isomer 5 |
| C                      | x    | 128.1           | 68.696187                  | 68.610927 |                                   |          |          |
| C                      | x    | 134.6           | 63.149925                  | 64.374212 |                                   |          |          |
| C                      | x    | 114.9           | 81.241776                  | 82.390394 |                                   |          |          |
| C                      | x    | 142.3           | 56.883976                  | 56.263626 |                                   |          |          |
| C                      | x    | 122.7           | 75.293985                  | 74.457137 |                                   |          |          |
| C                      | x    | 109.6           | 91.069051                  | 91.727528 |                                   |          |          |
| C                      | x    | 160.3           | 38.151679                  | 38.147949 |                                   |          |          |
| C                      | x    | 94.8            | 100.77355                  | 102.1278  |                                   |          |          |
| C                      | x    | 138.5           | 60.221499                  | 59.319637 |                                   |          |          |
| C                      | x    | 141.9           | 54.513557                  | 54.955497 |                                   |          |          |
| C                      | x    | 113.3           | 82.479926                  | 82.781732 |                                   |          |          |
| C                      | x    | 166.7           | 32.316834                  | 33.867284 |                                   |          |          |
| C                      | x    | 119.5           | 78.15785                   | 76.2045   |                                   |          |          |
| C                      |      | 55.3            | 141.06121                  | 141.2367  |                                   |          |          |
| C                      |      | 59.6            | 131.60502                  | 130.93646 |                                   |          |          |
| C                      |      | 28.3            | 164.03429                  | 160.7891  |                                   |          |          |
| C                      |      | 25.2            | 167.78942                  | 172.05316 |                                   |          |          |
| C                      |      | 49.5            | 143.68487                  | 145.13803 |                                   |          |          |
| C                      | x    | 141.1           | 49.782221                  | 51.834293 |                                   |          |          |
| C                      |      | 20.2            | 167.55664                  | 167.97163 |                                   |          |          |
| C                      |      | 27.1            | 175.10299                  | 174.79247 |                                   |          |          |
| C                      | x    | 172.6           | 21.956767                  | 22.106332 |                                   |          |          |
| C                      |      | 51.6            | 143.15113                  | 143.14681 |                                   |          |          |
| H                      |      | 11.75           | 23.300178                  | 23.492936 |                                   |          |          |
| H                      | x    | 8.17            | 23.004962                  | 22.816854 |                                   |          |          |
| H                      | x    | 6.88            | 24.388194                  | 24.282319 |                                   |          |          |
| H                      | x    | 7.04            | 24.215179                  | 24.213443 |                                   |          |          |
| H                      | x    | 8.33            | 22.576726                  | 22.303913 |                                   |          |          |
| H                      | x    | 6.79            | 24.535474                  | 24.678212 |                                   |          |          |
| H                      |      | 3.88            | 27.610338                  | 27.56437  |                                   |          |          |
| H                      |      | 3.88            | 27.602271                  | 27.562895 |                                   |          |          |
| H                      |      | 3.88            | 27.366184                  | 27.374408 |                                   |          |          |
| H                      |      | 4.55            | 26.849862                  | 25.885967 |                                   |          |          |
| H                      |      | 2.25            | 29.164588                  | 29.096674 |                                   |          |          |
| H                      |      | 1.87            | 29.543833                  | 29.333223 |                                   |          |          |
| H                      |      | 1.89            | 29.28754                   | 29.615029 |                                   |          |          |
| H                      |      | 1.89            | 29.504463                  | 29.589748 |                                   |          |          |
| H                      |      | 3.89            | 27.215012                  | 27.784882 |                                   |          |          |
| H                      |      | 4.01            | 27.330553                  | 27.571975 |                                   |          |          |
| H                      |      | 2.19            | 29.375931                  | 29.457411 |                                   |          |          |
| H                      |      | 2.19            | 29.390041                  | 29.404384 |                                   |          |          |
| H                      |      | 2.19            | 29.399801                  | 29.370211 |                                   |          |          |
| H                      |      | 2.06            | 28.958338                  | 29.817098 |                                   |          |          |
| H                      |      | 2.06            | 29.467512                  | 29.248691 |                                   |          |          |
| H                      |      | 2.06            | 29.282809                  | 29.593292 |                                   |          |          |
| H                      |      | 3.67            | 27.755986                  | 27.90077  |                                   |          |          |
| H                      |      | 3.67            | 27.758294                  | 28.024424 |                                   |          |          |
| H                      |      | 3.67            | 27.722865                  | 27.891192 |                                   |          |          |

| Functional       | Solvent? |          | Basis Set    |          | Type of Data      |          |
|------------------|----------|----------|--------------|----------|-------------------|----------|
| mPW1PW91         | PCM      |          | 6-31+G(d, p) |          | Shielding Tensors |          |
|                  | Isomer 1 | Isomer 2 | Isomer 3     | Isomer 4 | Isomer 5          | Isomer 6 |
| sDP4+ (H data)   | 99.56%   | 0.44%    | —            | —        | —                 | —        |
| sDP4+ (C data)   | 96.95%   | 3.05%    | —            | —        | —                 | —        |
| sDP4+ (all data) | 99.99%   | 0.01%    | —            | —        | —                 | —        |
| uDP4+ (H data)   | 72.11%   | 27.89%   | —            | —        | —                 | —        |
| uDP4+ (C data)   | 98.89%   | 1.11%    | —            | —        | —                 | —        |
| uDP4+ (all data) | 99.57%   | 0.43%    | —            | —        | —                 | —        |
| DP4+ (H data)    | 99.83%   | 0.17%    | —            | —        | —                 | —        |
| DP4+ (C data)    | 99.96%   | 0.04%    | —            | —        | —                 | —        |
| DP4+ (all data)  | 100.00%  | 0.00%    | —            | —        | —                 | —        |

Table S6. DP4+ probability analysis of compound 1b

| Functional<br>mPW1PW91 |      | Solvent?<br>PCM | Basis Set<br>6-31+G(d,p) |            | Type of Data<br>Shielding Tensors |          |          |
|------------------------|------|-----------------|--------------------------|------------|-----------------------------------|----------|----------|
|                        |      | DP4+            | 0.00%                    | 100.00%    | –                                 | –        | –        |
| Nuclei                 | sp2? | Experimental    | Isomer 1                 | Isomer 2   | Isomer 3                          | Isomer 4 | Isomer 5 |
| C                      | x    | 128.3           | 68.6961873               | 68.6109273 |                                   |          |          |
| C                      | x    | 134.4           | 63.1499247               | 64.3742116 |                                   |          |          |
| C                      | x    | 114.9           | 81.2417762               | 82.3903943 |                                   |          |          |
| C                      | x    | 142.5           | 56.8839757               | 56.2636256 |                                   |          |          |
| C                      | x    | 122.7           | 75.2939851               | 74.4571373 |                                   |          |          |
| C                      | x    | 109.6           | 91.0690507               | 91.7275278 |                                   |          |          |
| C                      | x    | 160.3           | 38.1516788               | 38.1479486 |                                   |          |          |
| C                      | x    | 94.8            | 100.773546               | 102.1278   |                                   |          |          |
| C                      | x    | 138.2           | 60.2214987               | 59.3196371 |                                   |          |          |
| C                      | x    | 141.8           | 54.5135575               | 54.9554967 |                                   |          |          |
| C                      | x    | 113.4           | 82.4799258               | 82.7817325 |                                   |          |          |
| C                      | x    | 166.2           | 32.3168345               | 33.8672844 |                                   |          |          |
| C                      | x    | 120             | 78.1578498               | 76.2045    |                                   |          |          |
| C                      |      | 55.3            | 141.061214               | 141.236703 |                                   |          |          |
| C                      |      | 60.7            | 131.605021               | 130.936461 |                                   |          |          |
| C                      |      | 31.3            | 164.034294               | 160.7891   |                                   |          |          |
| C                      |      | 21.6            | 167.789416               | 172.053161 |                                   |          |          |
| C                      |      | 47.8            | 143.684869               | 145.13803  |                                   |          |          |
| C                      | x    | 140.4           | 49.7822213               | 51.834293  |                                   |          |          |
| C                      |      | 19.9            | 167.556636               | 167.971628 |                                   |          |          |
| C                      |      | 26.5            | 175.102985               | 174.792466 |                                   |          |          |
| C                      | x    | 172.9           | 21.956767                | 22.1063318 |                                   |          |          |
| C                      |      | 51.4            | 143.15113                | 143.146812 |                                   |          |          |
| H                      |      | 11.55           | 23.3001778               | 23.4929364 |                                   |          |          |
| H                      | x    | 8.17            | 23.0049622               | 22.8168538 |                                   |          |          |
| H                      | x    | 6.87            | 24.3881935               | 24.2823191 |                                   |          |          |
| H                      | x    | 7.04            | 24.2151792               | 24.2134434 |                                   |          |          |
| H                      | x    | 8.43            | 22.576726                | 22.3039125 |                                   |          |          |
| H                      | x    | 6.59            | 24.5354738               | 24.6782118 |                                   |          |          |
| H                      |      | 3.87            | 27.6103376               | 27.5643695 |                                   |          |          |
| H                      |      | 3.87            | 27.6022711               | 27.5628948 |                                   |          |          |
| H                      |      | 3.87            | 27.3661844               | 27.3744084 |                                   |          |          |
| H                      |      | 5.21            | 26.8498616               | 25.8859672 |                                   |          |          |
| H                      |      | 2.28            | 29.1645881               | 29.096674  |                                   |          |          |
| H                      |      | 1.97            | 29.5438328               | 29.3332235 |                                   |          |          |
| H                      |      | 1.83            | 29.28754                 | 29.6150288 |                                   |          |          |
| H                      |      | 1.83            | 29.5044628               | 29.5897475 |                                   |          |          |
| H                      |      | 3.69            | 27.2150119               | 27.7848822 |                                   |          |          |
| H                      |      | 3.69            | 27.330553                | 27.5719746 |                                   |          |          |
| H                      |      | 1.91            | 29.3759312               | 29.4574115 |                                   |          |          |
| H                      |      | 1.91            | 29.3900407               | 29.404384  |                                   |          |          |
| H                      |      | 1.91            | 29.3998011               | 29.3702109 |                                   |          |          |
| H                      |      | 2.03            | 28.9583379               | 29.8170976 |                                   |          |          |
| H                      |      | 2.03            | 29.4675123               | 29.2486909 |                                   |          |          |
| H                      |      | 2.03            | 29.2828089               | 29.5932925 |                                   |          |          |
| H                      |      | 3.46            | 27.7559859               | 27.9007698 |                                   |          |          |
| H                      |      | 3.46            | 27.7582935               | 28.0244238 |                                   |          |          |
| H                      |      | 3.46            | 27.7228653               | 27.8911917 |                                   |          |          |

| Functional       | Solvent?                                                                                |                                                                                           | Basis Set    |          | Type of Data      |          |
|------------------|-----------------------------------------------------------------------------------------|-------------------------------------------------------------------------------------------|--------------|----------|-------------------|----------|
| mPW1PW91         | PCM                                                                                     |                                                                                           | 6-31+G(d, p) |          | Shielding Tensors |          |
|                  | Isomer 1                                                                                | Isomer 2                                                                                  | Isomer 3     | Isomer 4 | Isomer 5          | Isomer 6 |
| SDP4+ (H data)   |  0.00% |  100.00% | —            | —        | —                 | —        |
| SDP4+ (C data)   |  0.26% |  99.74%  | —            | —        | —                 | —        |
| SDP4+ (all data) |  0.00% |  100.00% | —            | —        | —                 | —        |
| uDP4+ (H data)   |  0.02% |  99.98%  | —            | —        | —                 | —        |
| uDP4+ (C data)   |  0.29% |  99.71%  | —            | —        | —                 | —        |
| uDP4+ (all data) |  0.00% |  100.00% | —            | —        | —                 | —        |
| DP4+ (H data)    |  0.00% |  100.00% | —            | —        | —                 | —        |
| DP4+ (C data)    |  0.00% |  100.00% | —            | —        | —                 | —        |
| DP4+ (all data)  |  0.00% |  100.00% | —            | —        | —                 | —        |

Table S7. DP4+ probability analysis of compound 7.

| Functional<br>mPW1PW91 |      | Solvent?<br>PCM | Basis Set<br>6-31+G(d,p) |            | Type of Data<br>Shielding Tensors |          |          |
|------------------------|------|-----------------|--------------------------|------------|-----------------------------------|----------|----------|
|                        |      | DP4+            | 100.00%                  | 0.00%      | –                                 | –        | –        |
| Nuclei                 | sp2? | Experimental    | Isomer 1                 | Isomer 2   | Isomer 3                          | Isomer 4 | Isomer 5 |
| C                      |      | 91.1            | 101.430164               | 99.9309415 |                                   |          |          |
| C                      |      | 74.9            | 119.133947               | 119.452039 |                                   |          |          |
| C                      |      | 92.4            | 105.179152               | 103.192169 |                                   |          |          |
| C                      | x    | 166.5           | 33.2918413               | 30.7774664 |                                   |          |          |
| C                      | x    | 196.3           | 1.89352267               | 2.31874554 |                                   |          |          |
| C                      | x    | 133.4           | 66.50782                 | 66.2249206 |                                   |          |          |
| C                      | x    | 130.2           | 63.4605916               | 62.8861971 |                                   |          |          |
| C                      | x    | 128.3           | 69.6808631               | 70.2998307 |                                   |          |          |
| C                      | x    | 133.7           | 62.0863358               | 60.2749689 |                                   |          |          |
| C                      | x    | 128.3           | 68.0314773               | 72.3171495 |                                   |          |          |
| C                      | x    | 130.2           | 67.277268                | 62.7786561 |                                   |          |          |
| C                      | x    | 186.9           | 9.05045029               | 5.97530612 |                                   |          |          |
| C                      | x    | 111.5           | 82.5380389               | 85.3230747 |                                   |          |          |
| C                      | x    | 196.7           | 1.31648299               | 2.49274938 |                                   |          |          |
| C                      |      | 5.6             | 188.663258               | 187.973855 |                                   |          |          |
| C                      |      | 71.9            | 122.180396               | 122.454146 |                                   |          |          |
| C                      |      | 68.3            | 124.723411               | 123.102124 |                                   |          |          |
| C                      | x    | 129.8           | 71.7265826               | 70.1096391 |                                   |          |          |
| C                      | x    | 131.9           | 57.7494436               | 61.0857372 |                                   |          |          |
| C                      |      | 29.2            | 163.186966               | 163.883029 |                                   |          |          |
| C                      |      | 22.2            | 169.944114               | 171.104124 |                                   |          |          |
| C                      |      | 13.5            | 181.03406                | 181.821077 |                                   |          |          |
| C                      |      | 51.6            | 144.495337               | 144.367853 |                                   |          |          |
| H                      |      | 4.4             | 26.8918503               | 26.6435514 |                                   |          |          |
| H                      | x    | 8.25            | 22.2173312               | 22.2297111 |                                   |          |          |
| H                      | x    | 7.53            | 23.6619316               | 23.5714441 |                                   |          |          |
| H                      | x    | 7.67            | 23.3758739               | 23.5237246 |                                   |          |          |
| H                      | x    | 7.53            | 23.5890035               | 23.4205045 |                                   |          |          |
| H                      | x    | 8.25            | 22.7057917               | 22.7671522 |                                   |          |          |
| H                      |      | 1.64            | 29.7987648               | 29.8149259 |                                   |          |          |
| H                      |      | 1.64            | 29.7621518               | 29.8037448 |                                   |          |          |
| H                      |      | 1.64            | 29.6849628               | 29.8299236 |                                   |          |          |
| H                      |      | 4.34            | 27.1299255               | 26.7944493 |                                   |          |          |
| H                      |      | 4.45            | 26.6775897               | 26.6975652 |                                   |          |          |
| H                      | x    | 5.41            | 25.7236688               | 25.2955444 |                                   |          |          |
| H                      | x    | 5.43            | 25.4276015               | 25.4517071 |                                   |          |          |
| H                      |      | 1.99            | 29.5812925               | 29.3108829 |                                   |          |          |
| H                      |      | 1.99            | 29.4947758               | 29.2799105 |                                   |          |          |
| H                      |      | 1.3             | 30.3012988               | 30.0476043 |                                   |          |          |
| H                      |      | 1.3             | 30.2334978               | 29.9762157 |                                   |          |          |
| H                      |      | 0.83            | 30.5803041               | 30.5347231 |                                   |          |          |
| H                      |      | 0.83            | 30.8330007               | 30.8392104 |                                   |          |          |
| H                      |      | 0.83            | 30.8965675               | 30.6496093 |                                   |          |          |
| H                      |      | 3.25            | 27.8331797               | 27.8398647 |                                   |          |          |
| H                      |      | 3.25            | 28.0193399               | 27.8019527 |                                   |          |          |
| H                      |      | 3.25            | 28.4299435               | 28.5476358 |                                   |          |          |



| Functional       | Solvent?                                                                                  |                                                                                          | Basis Set    |          | Type of Data      |          |
|------------------|-------------------------------------------------------------------------------------------|------------------------------------------------------------------------------------------|--------------|----------|-------------------|----------|
| mPW1PW91         | PCM                                                                                       |                                                                                          | 6-31+G(d, p) |          | Shielding Tensors |          |
|                  | Isomer 1                                                                                  | Isomer 2                                                                                 | Isomer 3     | Isomer 4 | Isomer 5          | Isomer 6 |
| SDP4+ (H data)   |  88.97%  |  11.03% | —            | —        | —                 | —        |
| SDP4+ (C data)   |  99.17%  |  0.83%  | —            | —        | —                 | —        |
| SDP4+ (all data) |  99.90%  |  0.10%  | —            | —        | —                 | —        |
| uDP4+ (H data)   |  100.00% |  0.00%  | —            | —        | —                 | —        |
| uDP4+ (C data)   |  95.48%  |  4.52%  | —            | —        | —                 | —        |
| uDP4+ (all data) |  100.00% |  0.00%  | —            | —        | —                 | —        |
| DP4+ (H data)    |  100.00% |  0.00%  | —            | —        | —                 | —        |
| DP4+ (C data)    |  99.96%  |  0.04%  | —            | —        | —                 | —        |
| DP4+ (all data)  |  100.00% |  0.00%  | —            | —        | —                 | —        |

Figure S1. Chiral HPLC analysis of the acidic hydrolysate of compounds **1a/1b**.

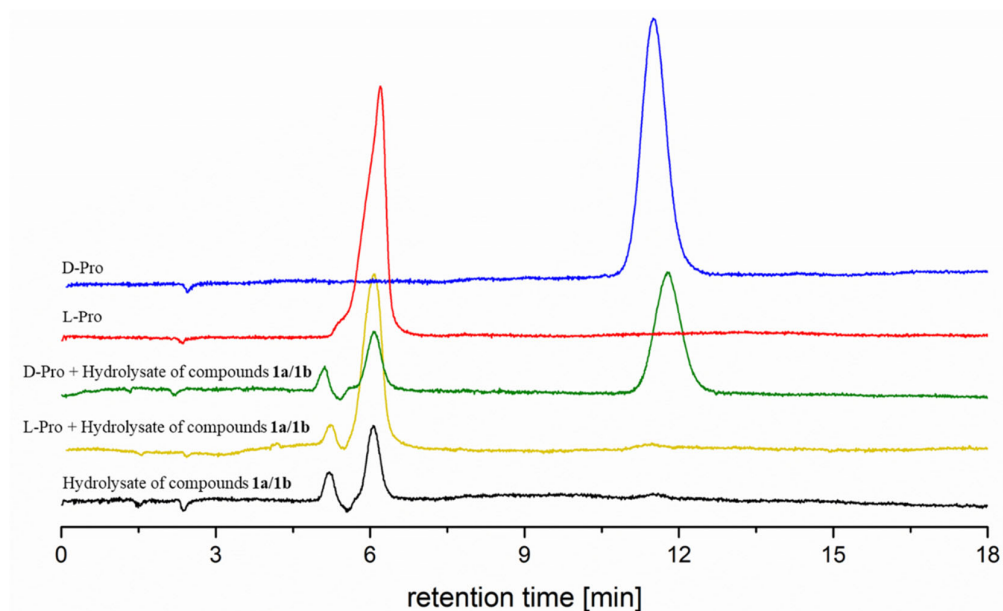

Figure S2.  $^1\text{H}$  NMR (500 MHz,  $\text{DMSO}-d_6$ ) spectrum of compounds **1a/1b**.

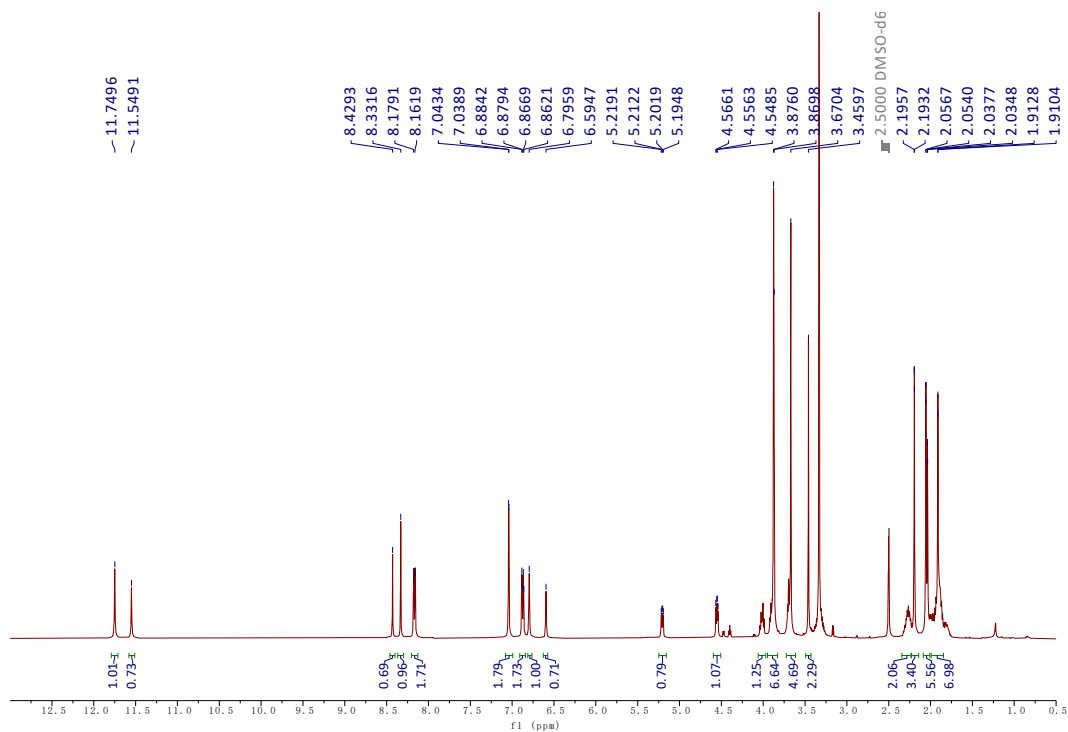

**Figure S3.**  $^{13}\text{C}$  NMR (125 MHz,  $\text{DMSO-}d_6$ ) and DEPT spectra of compounds **1a/1b**.

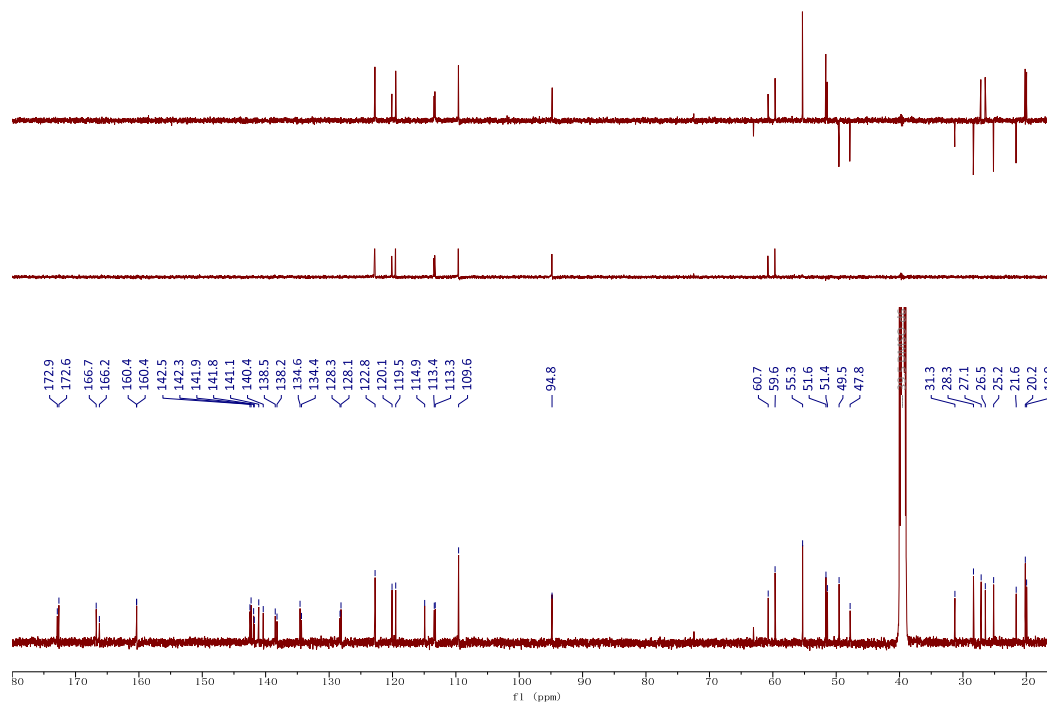

**Figure S4.**  $^1\text{H}$ - $^1\text{H}$  COSY spectrum of compounds **1a/1b**.

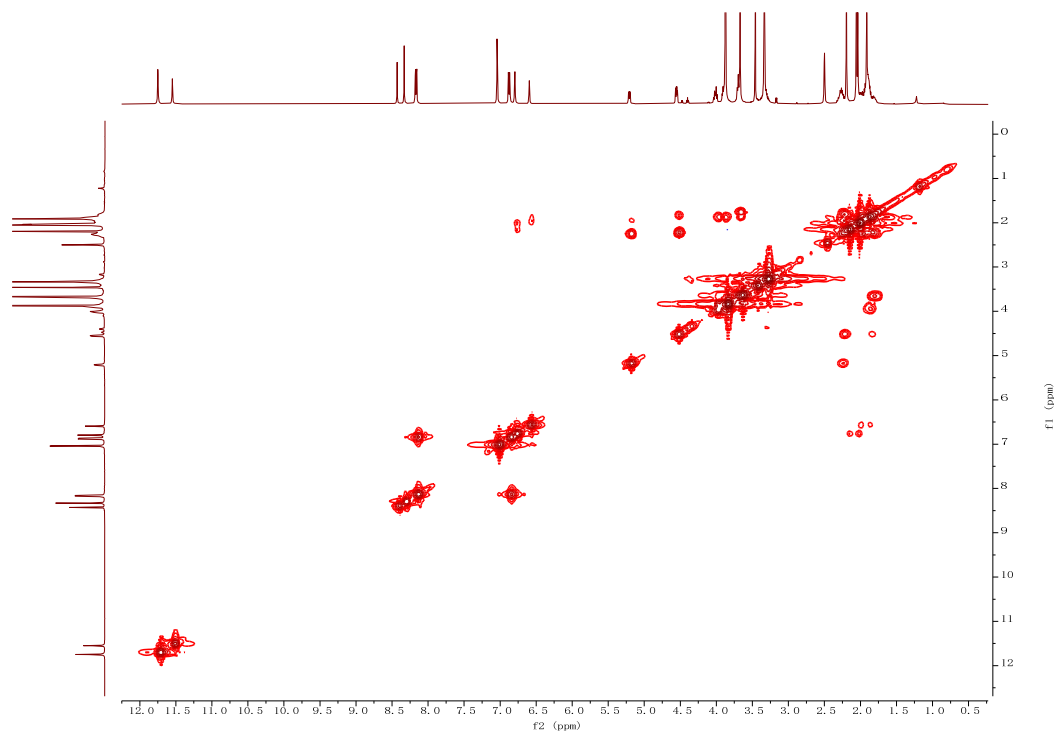

Figure S5. HSQC spectrum of compounds **1a/1b**.

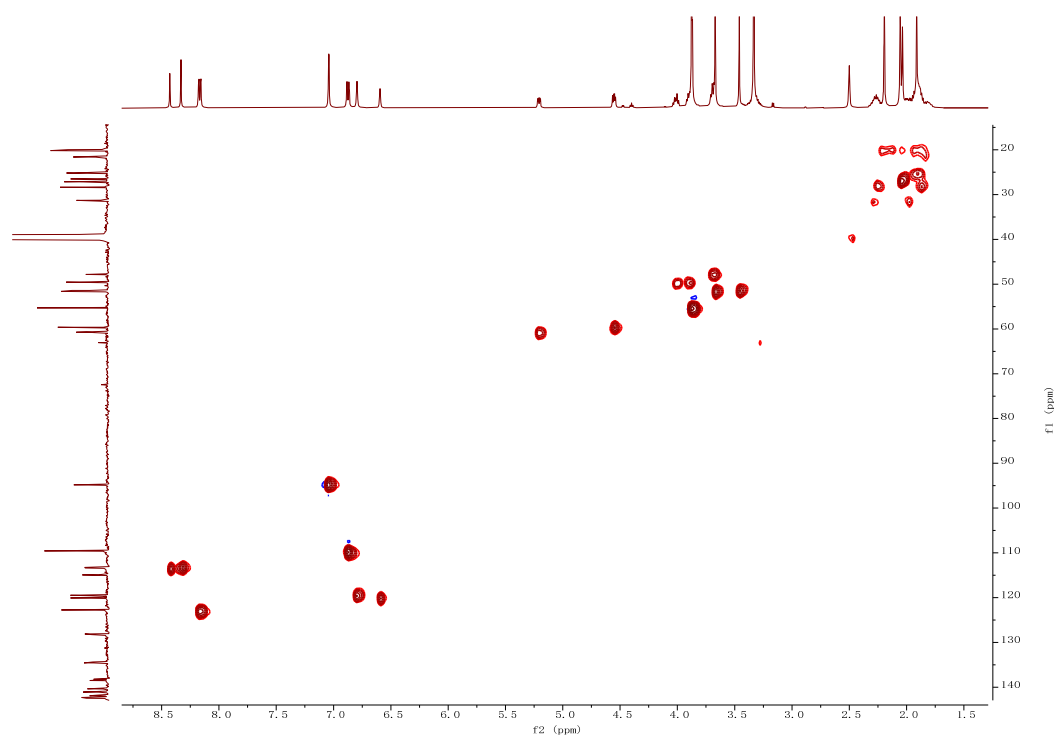

Figure S6. HMBC spectrum of compounds **1a/1b**.

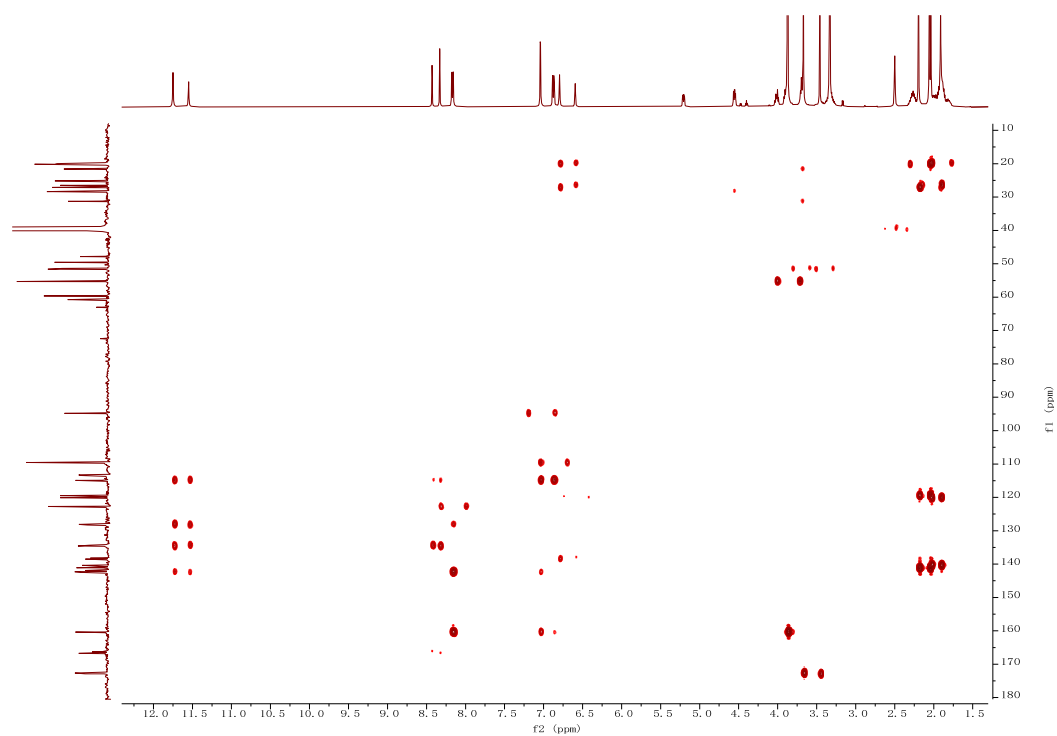

**Figure S7.** NOESY spectrum of compounds **1a/1b**.

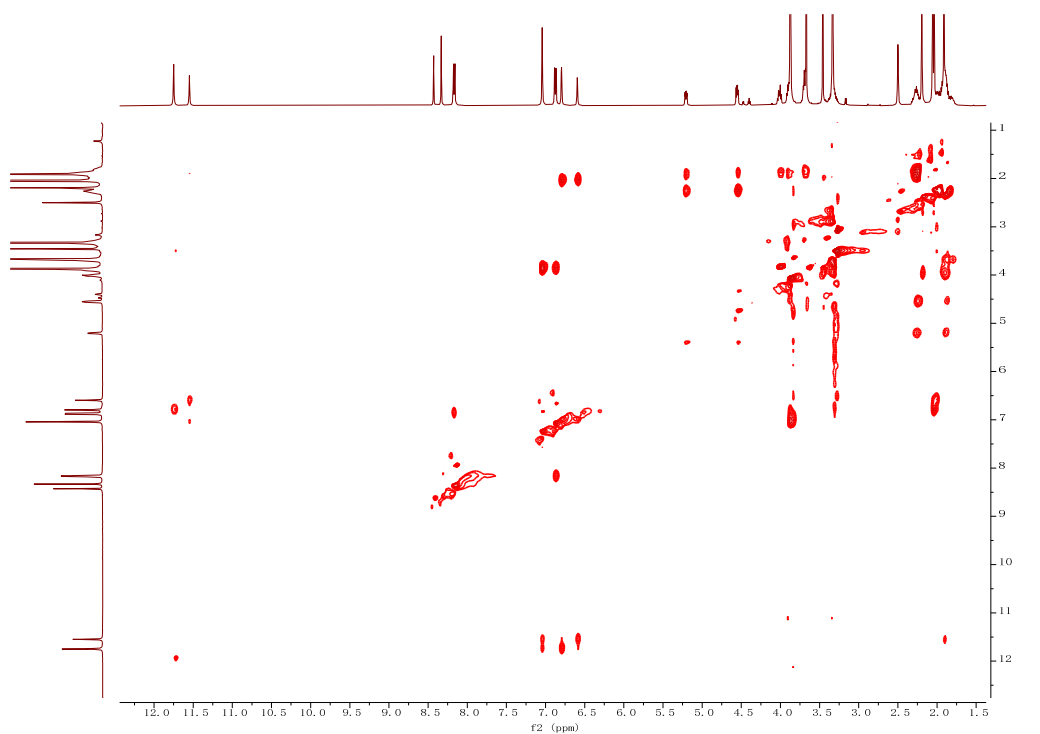

**Figure S8.** HR-ESI-MS spectrum of compounds **1a/1b**.

20210906-SD406-56\_210906110302 #17-19 RT: 0.14-0.16 AV: 3 NL: 2.58E7  
T: FTMS - p ESI Full ms [150.00-2000.00]

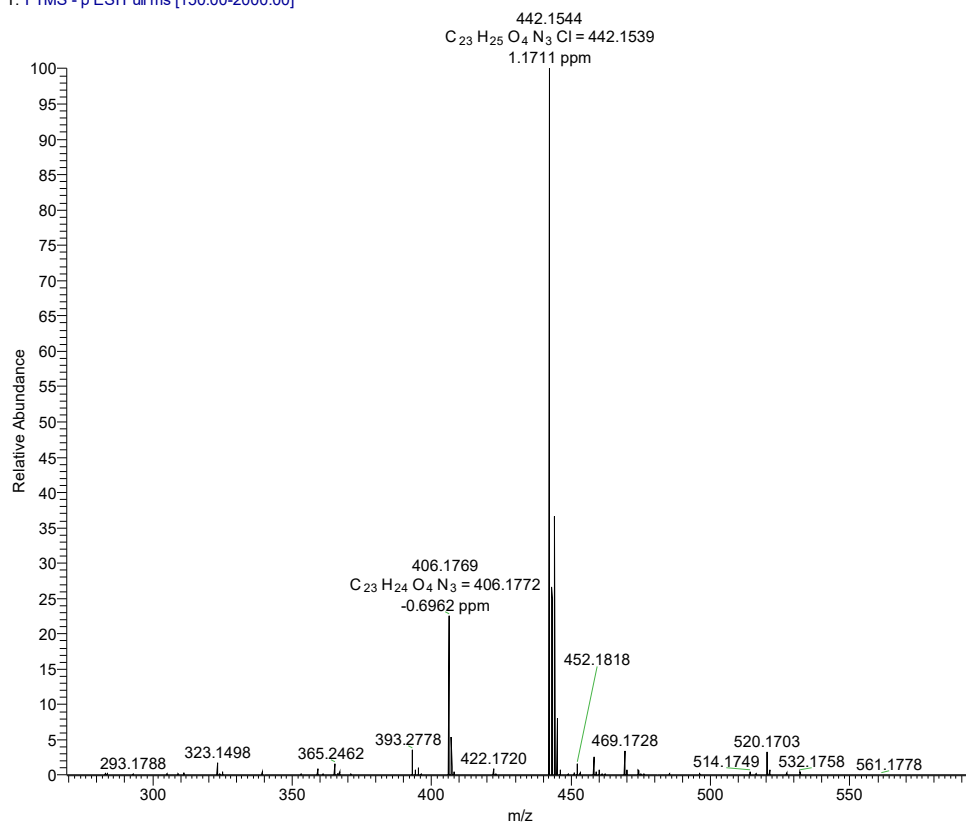

Figure S9. Optimized geometries of predominant conformers (weighting factors) for **isomer 1** at the B3LYP/6-311g(d,p) level above 2% population.

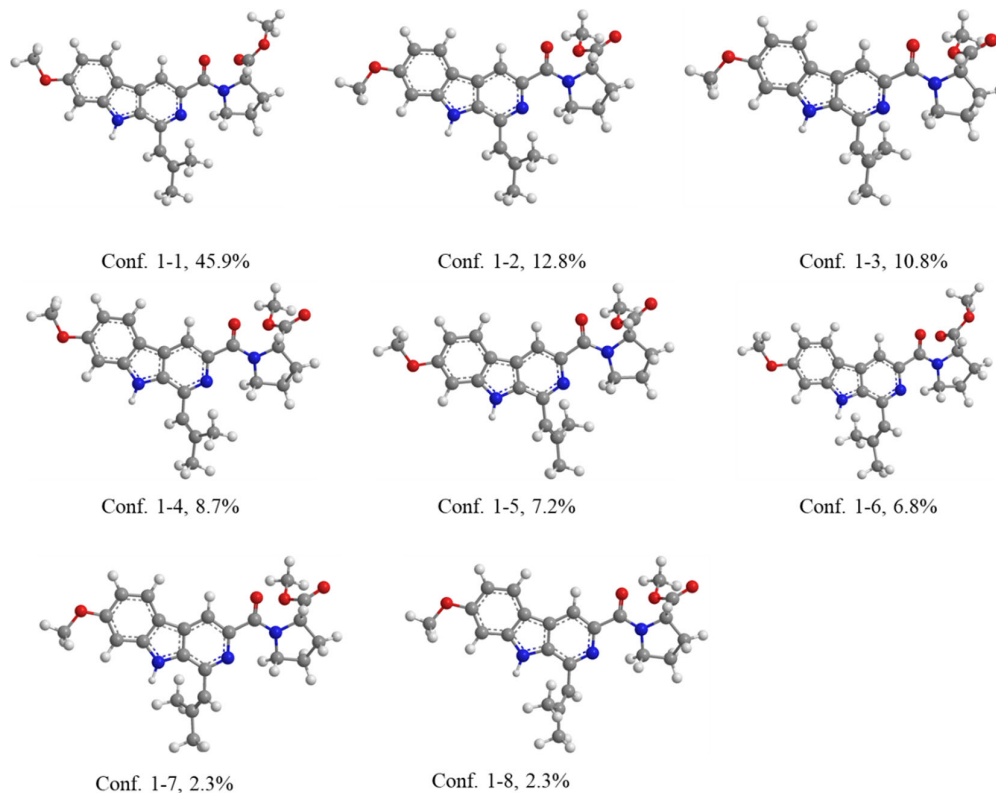

Figure S10. Optimized geometries of predominant conformers (weighting factors) for **isomer 2** at the B3LYP/6-311g(d,p) level above 2% population.

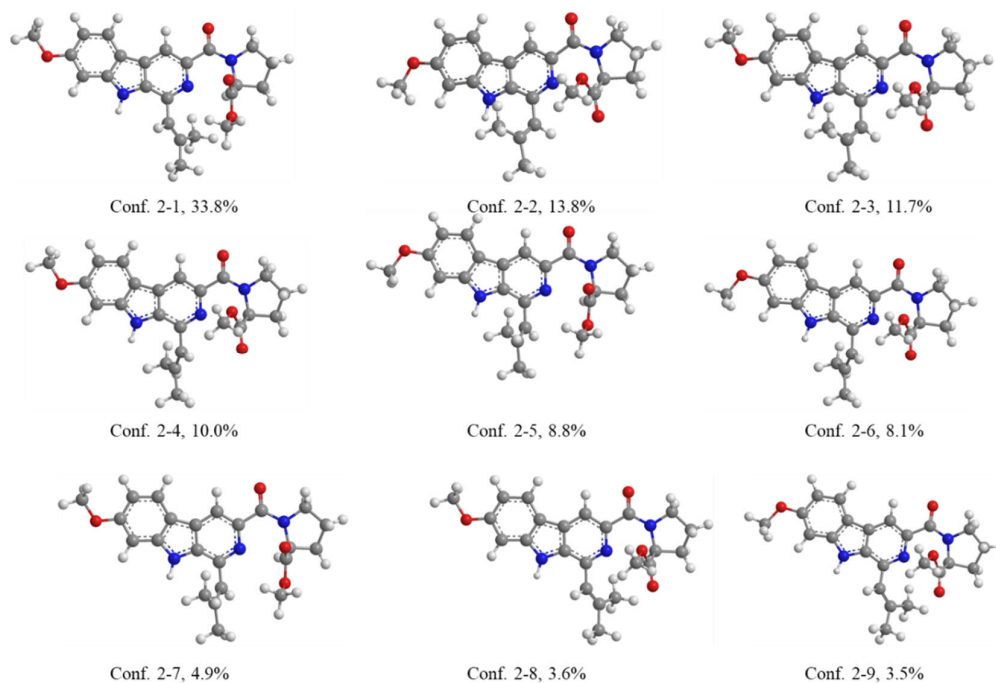

Figure S11.  $^1\text{H}$ -NMR (500 MHz,  $\text{DMSO}-d_6$ ) spectrum of compound 6.

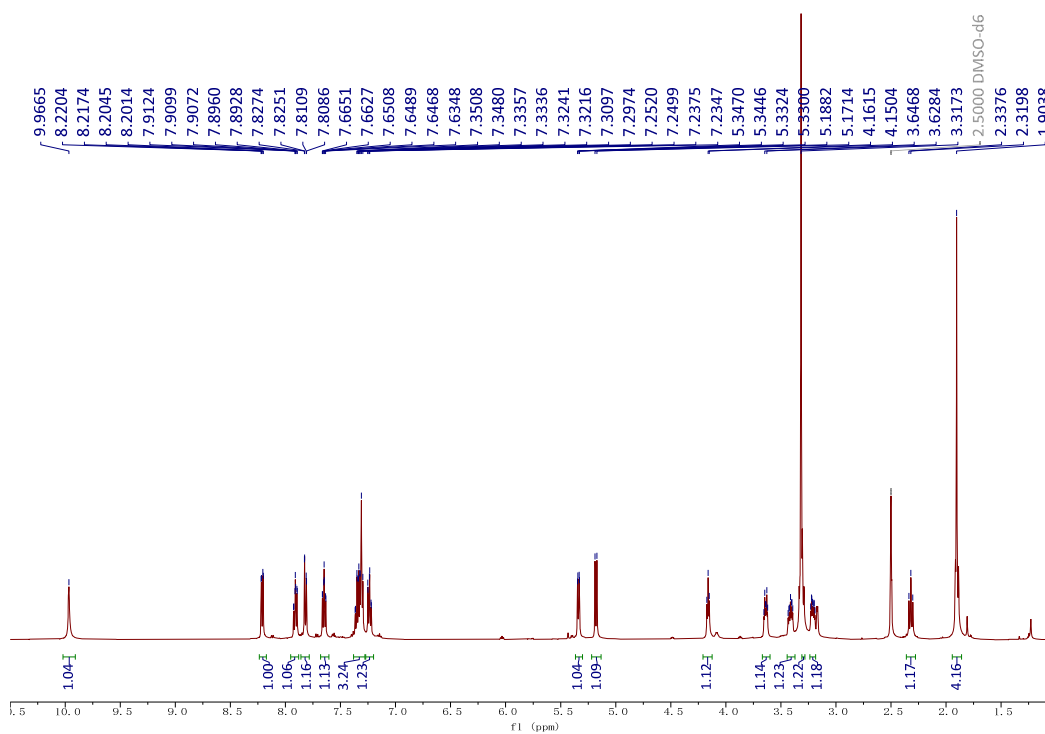

Figure S12.  $^{13}\text{C}$  NMR (125 MHz,  $\text{DMSO}-d_6$ ) and DEPT spectra of compound 6.

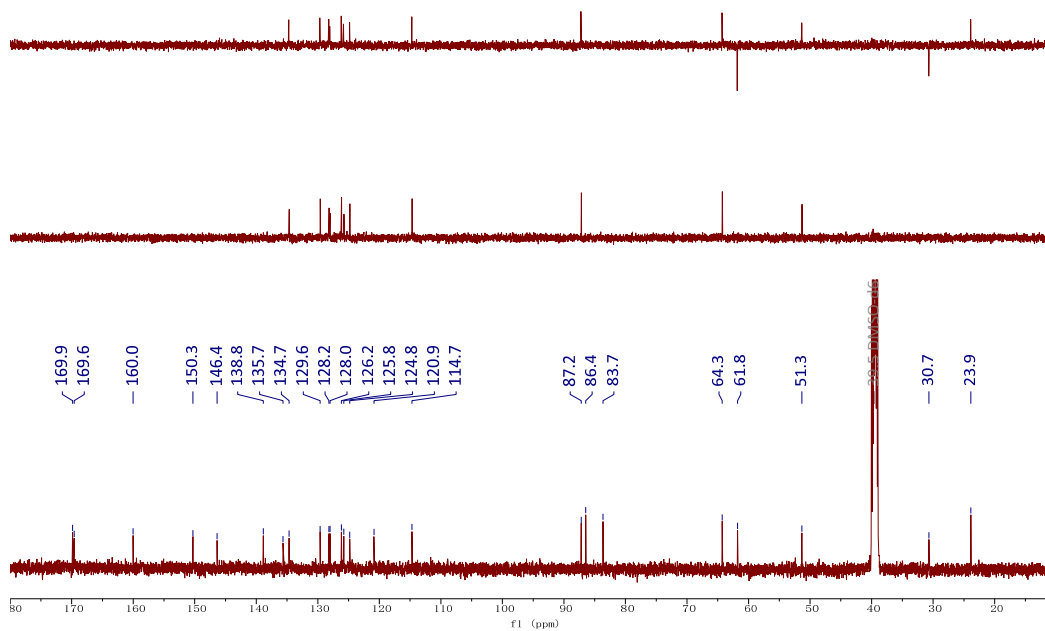

**Figure S13.**  $^1\text{H}$ - $^1\text{H}$  COSY spectrum of compound 6.

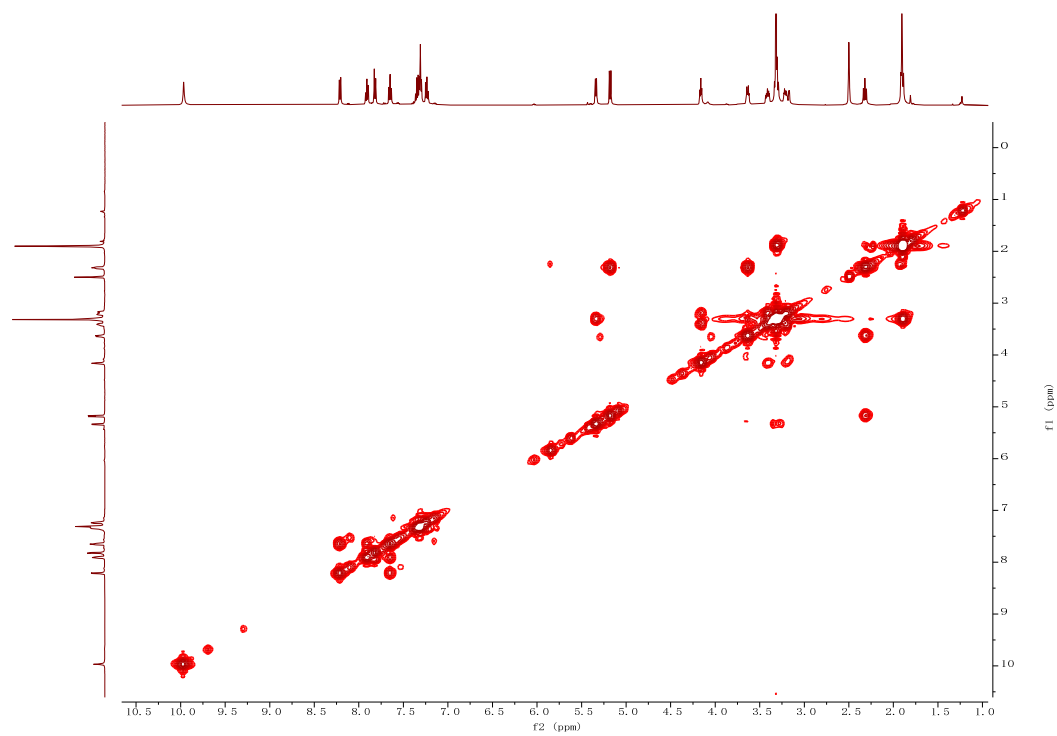

**Figure S14.** HSQC spectrum of compound 6.

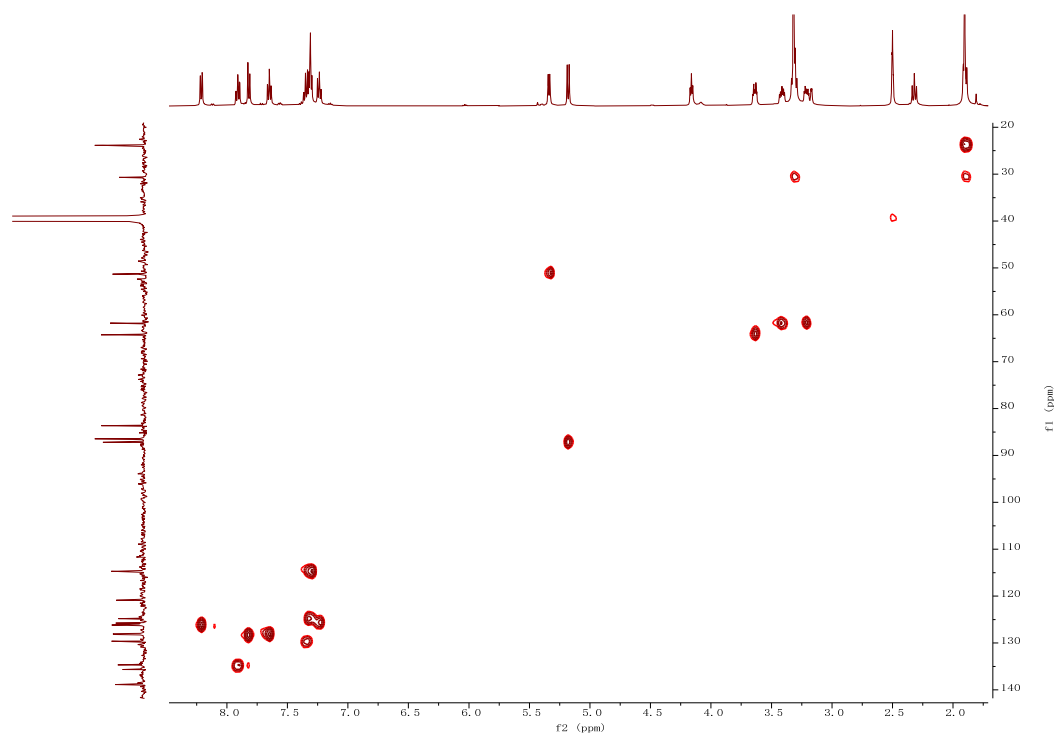



**Figure S15.** HMBC spectrum of compound **6**.

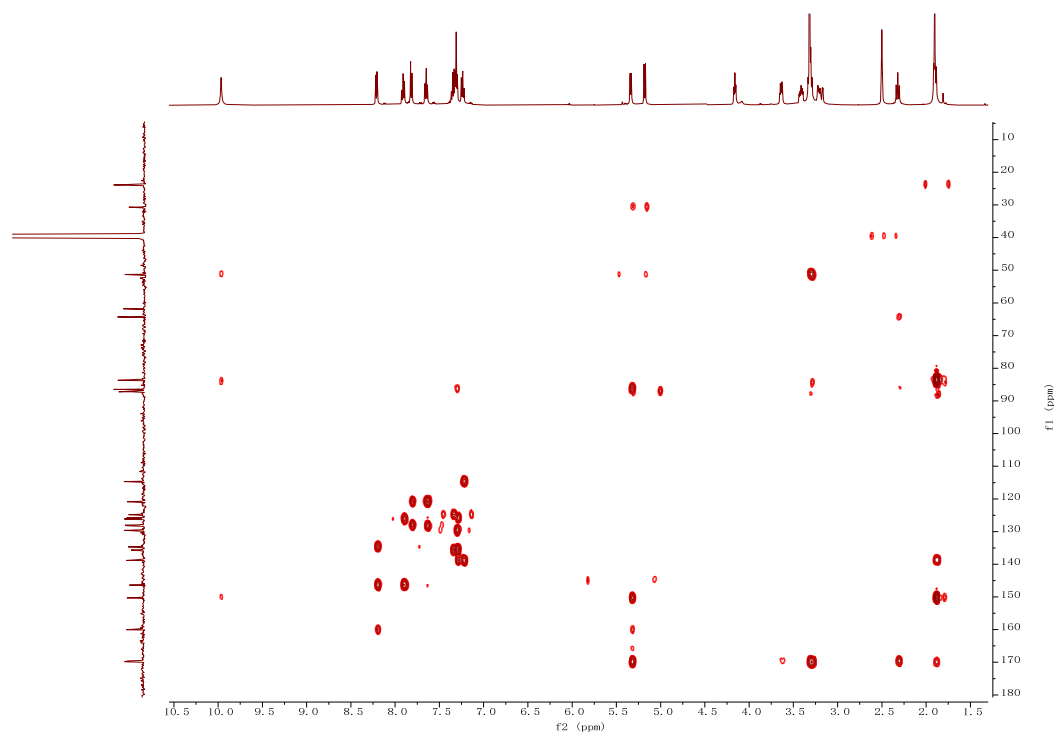

**Figure S16.** NOESY spectrum of compound **6**.

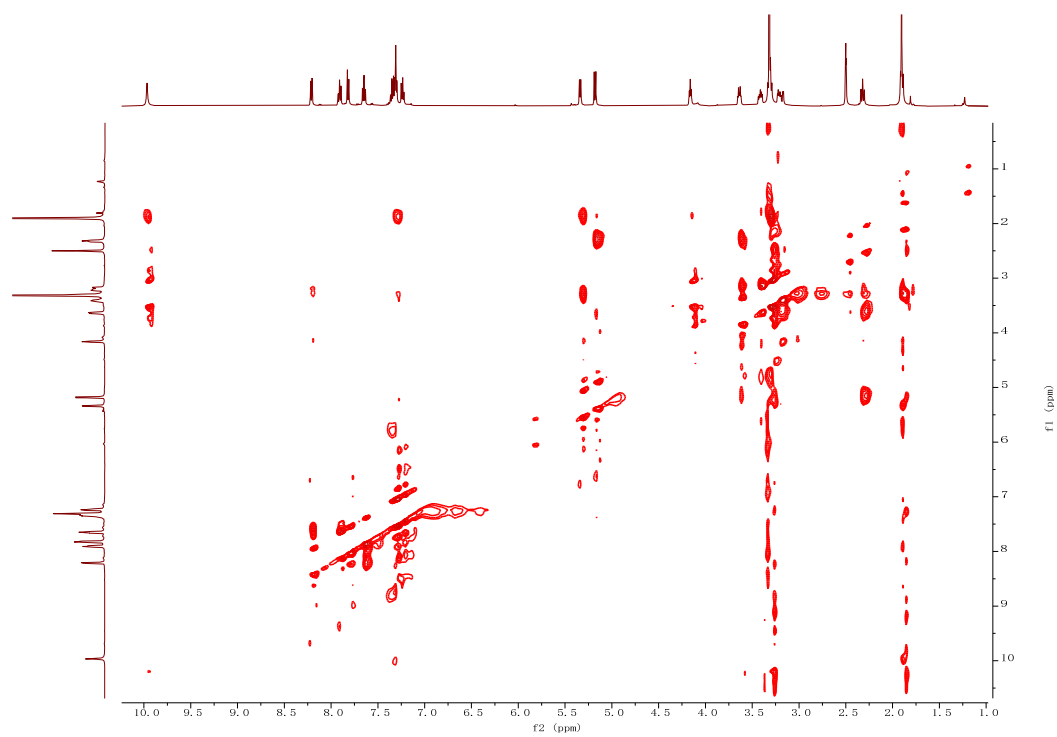

**Figure S17.** HR-ESI-MS spectrum of compound **6**.

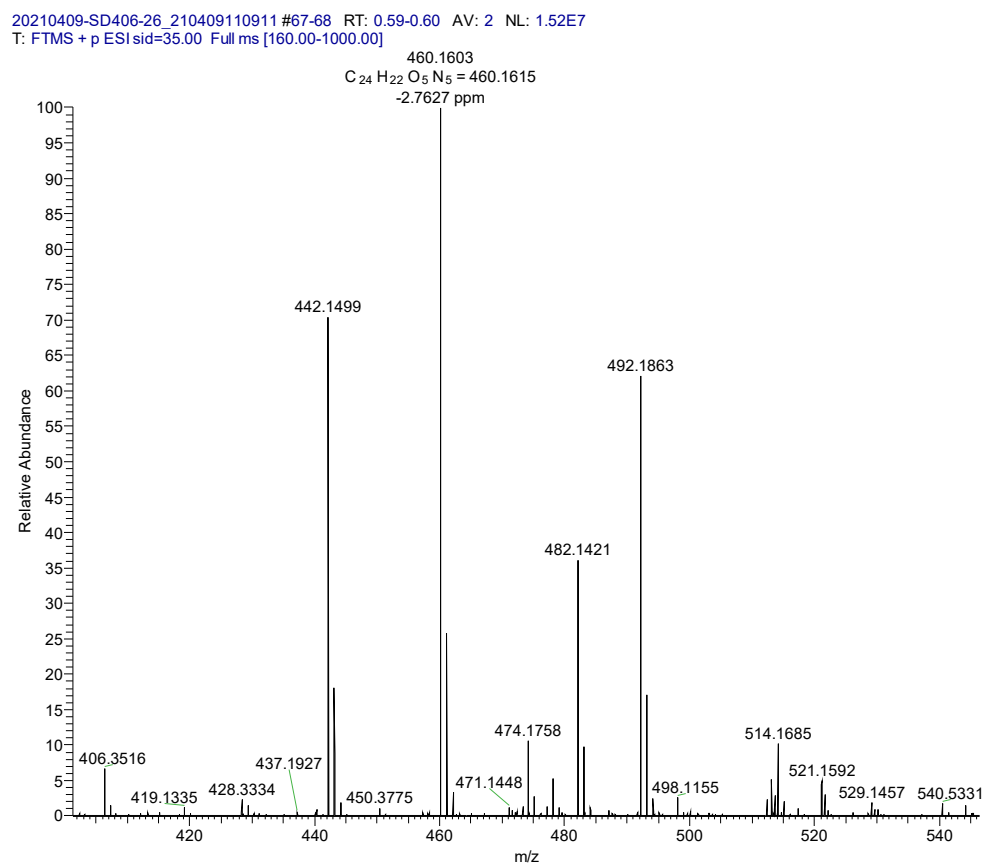

**Figure S18.** ECD spectrum of compound **6**.

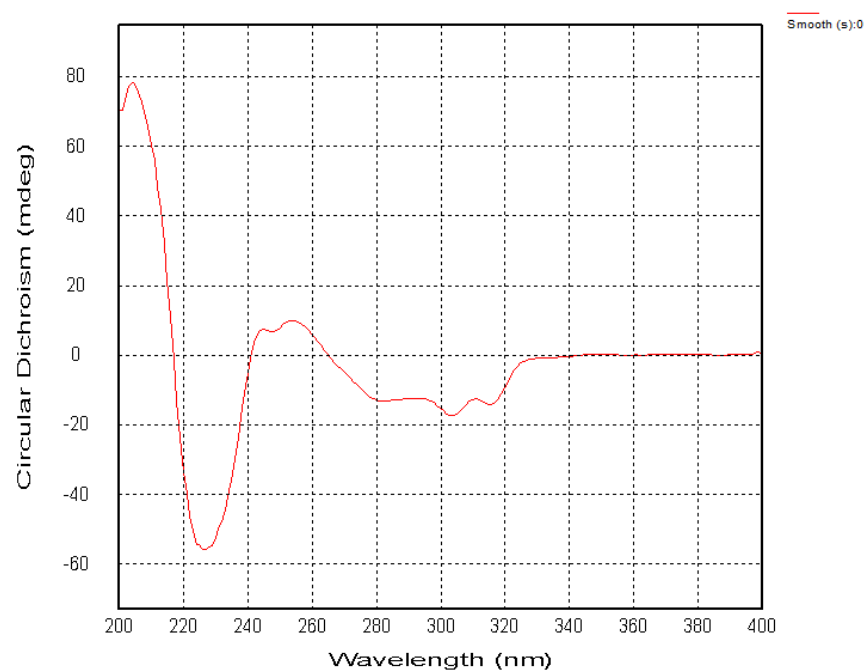

Figure S19.  $^1\text{H}$ -NMR (500 MHz,  $\text{DMSO}-d_6$ ) spectrum of compound 7.

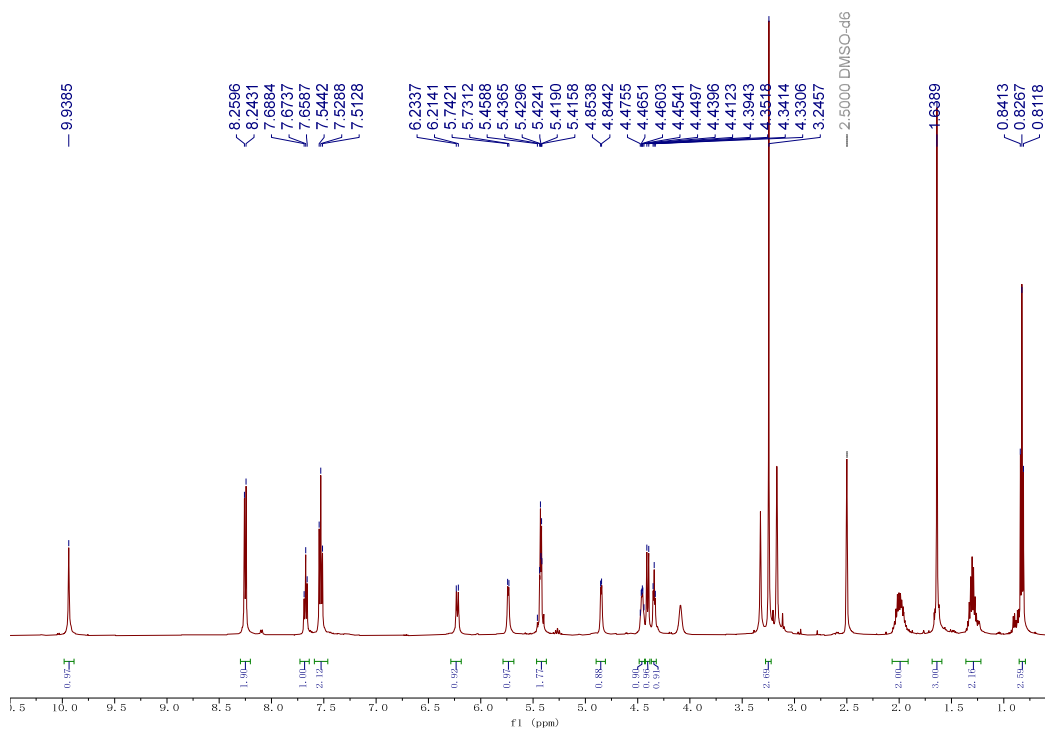

Figure S20.  $^{13}\text{C}$  NMR (125 MHz,  $\text{DMSO}-d_6$ ) and DEPT spectra of compound 7.

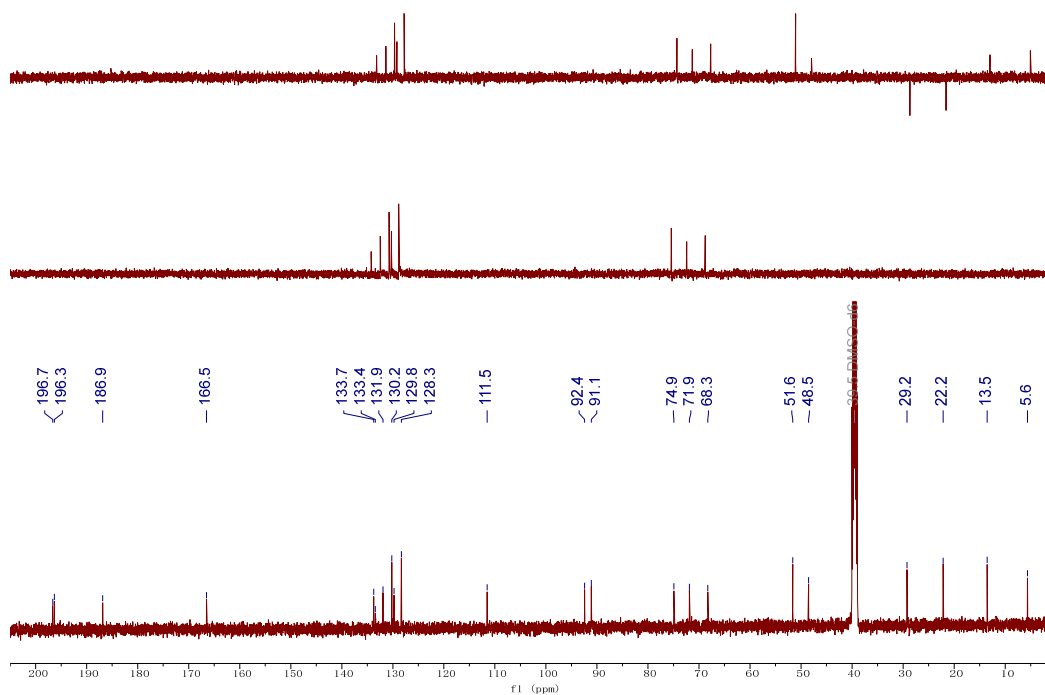

Figure S21.  $^1\text{H}$ - $^1\text{H}$  COSY spectrum of compound 7.

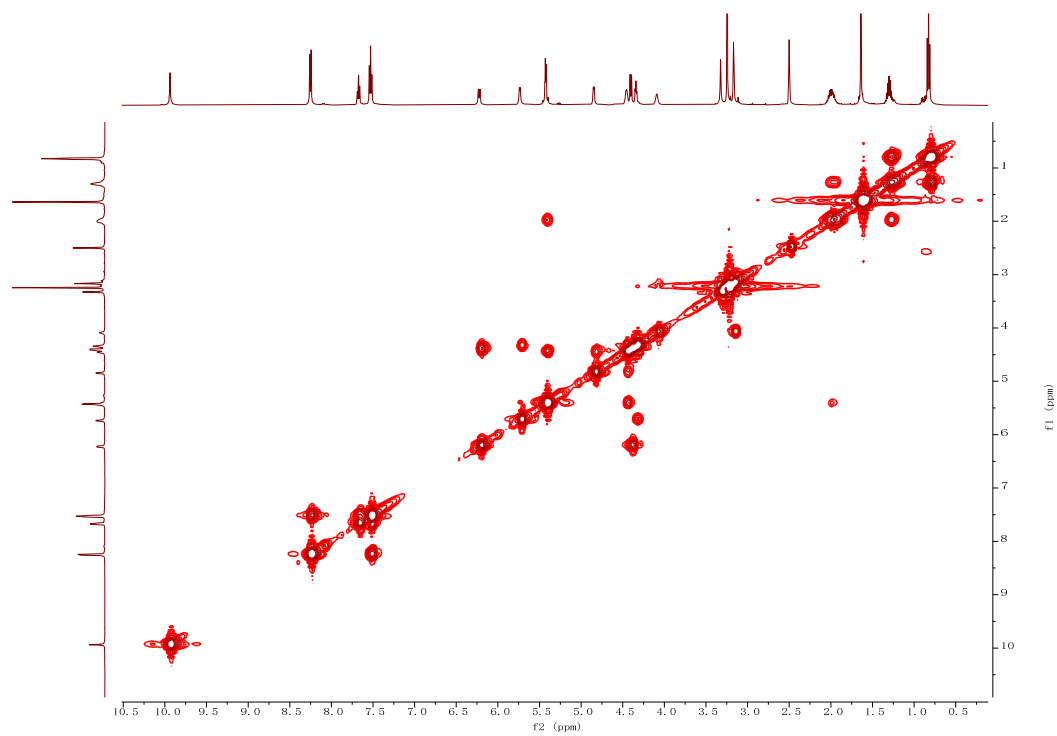

Figure S22. HSQC spectrum of compound 7.

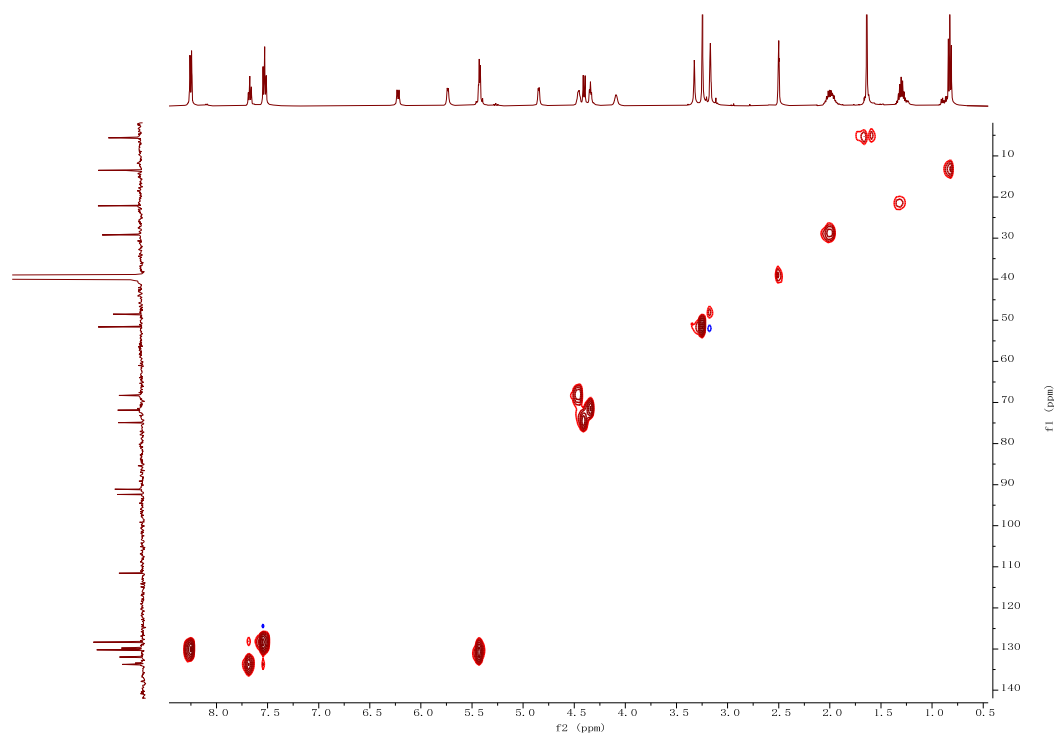

Figure S23. HMBC spectrum of compound 7.

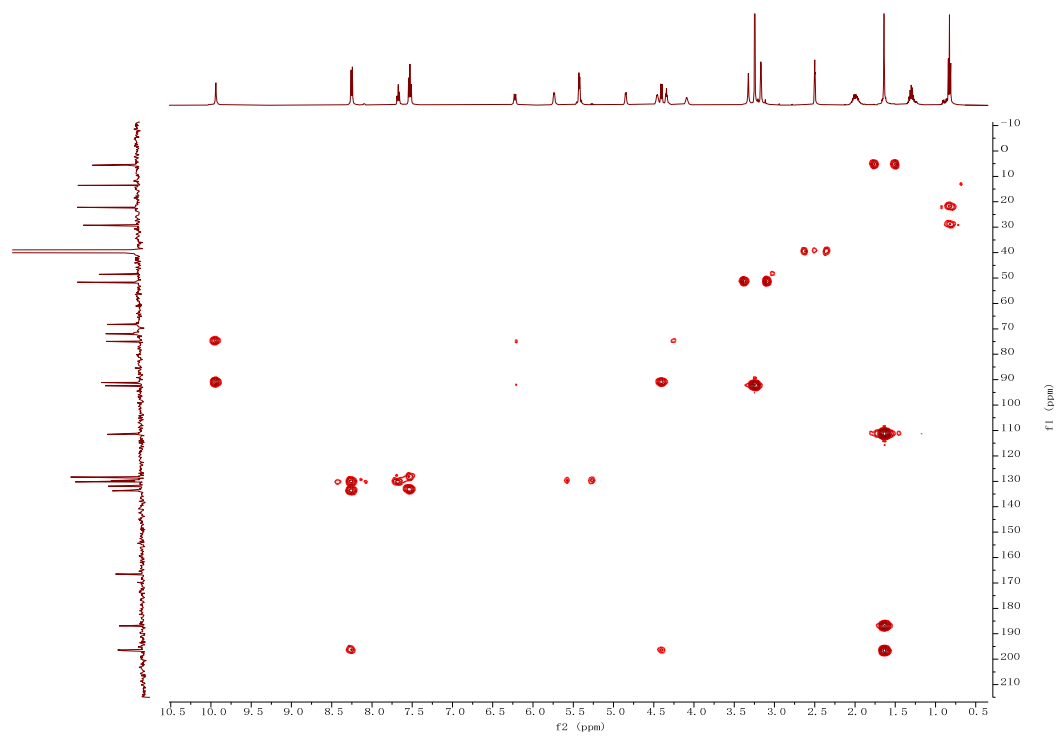

Figure S24. *J*-HMBC spectrum of compound 7.

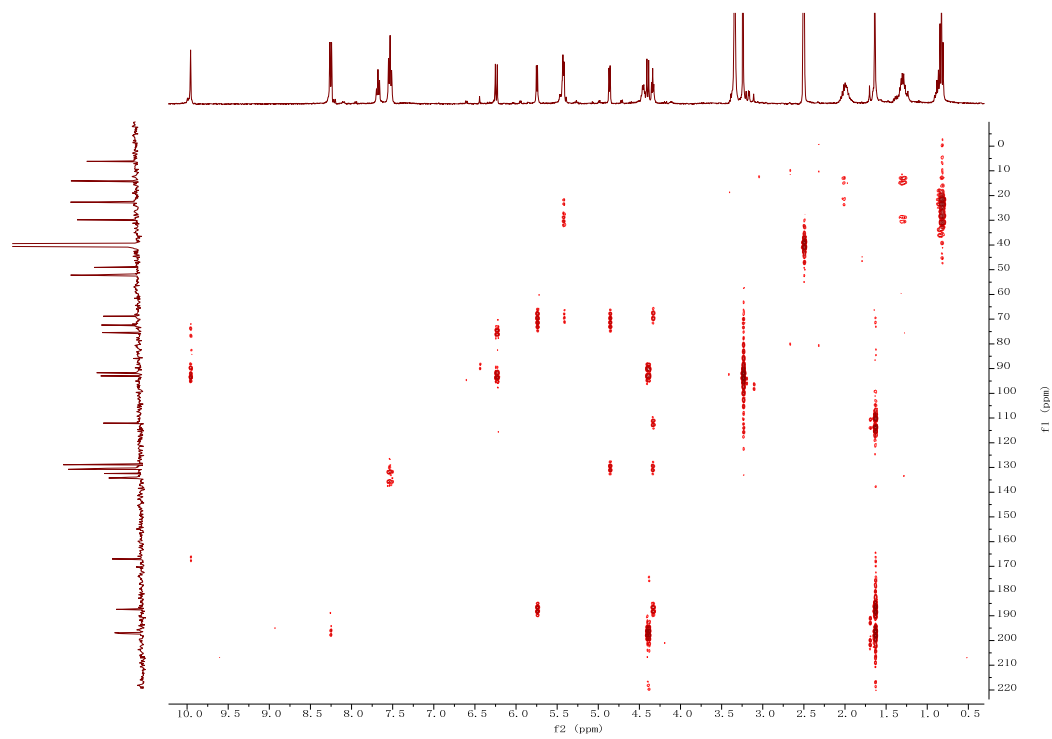

Figure S25. HR-ESI-MS spectrum of compound 7.

20210112-SD406-10\_210113081102 #49-50 RT: 0.40-0.41 AV: 2 NL: 1.34E7  
T: FTMS + p ESI sid=35.00 Full ms [170.00-1000.00]

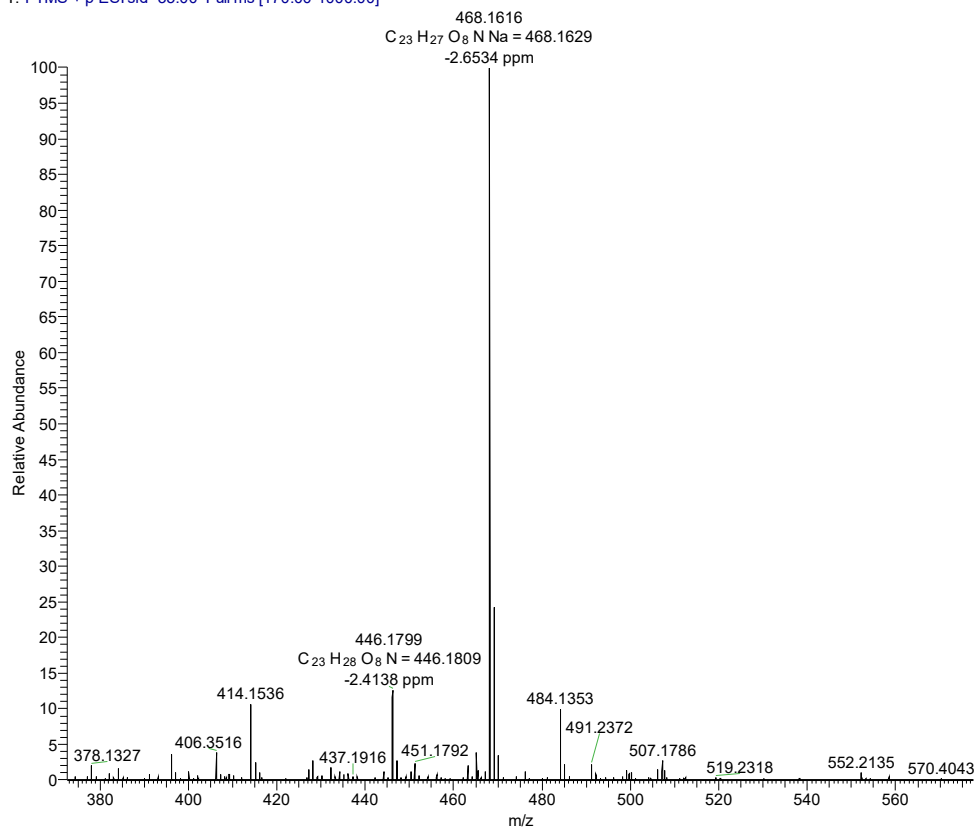

Figure S26. ECD spectrum of compound 7.

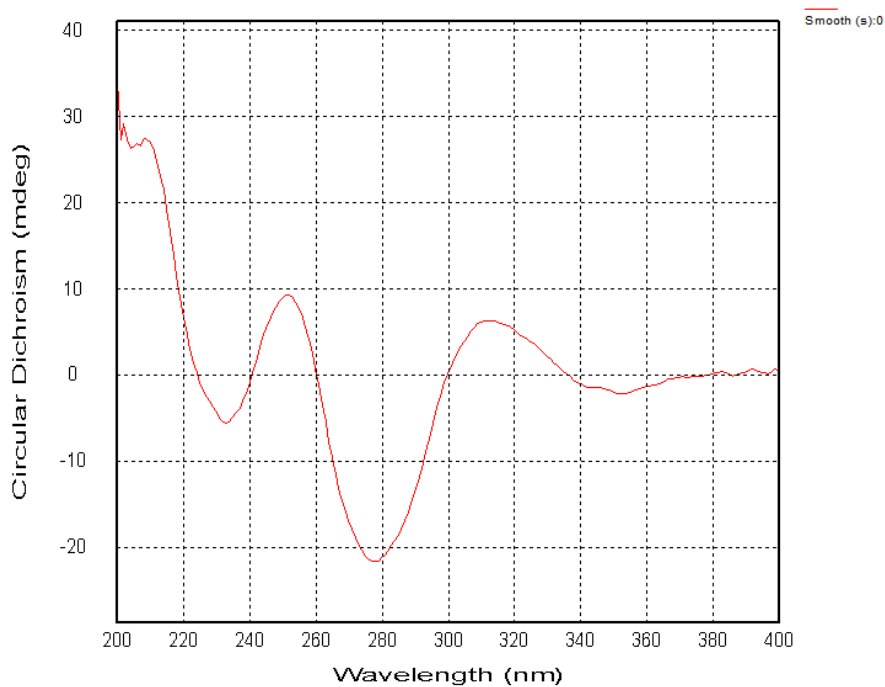

**Figure S27** Optimized geometries of predominant conformers (weighting factors) for **isomers 7a-7d** at the B3LYP/6-311g(d,p) level above 2% population.

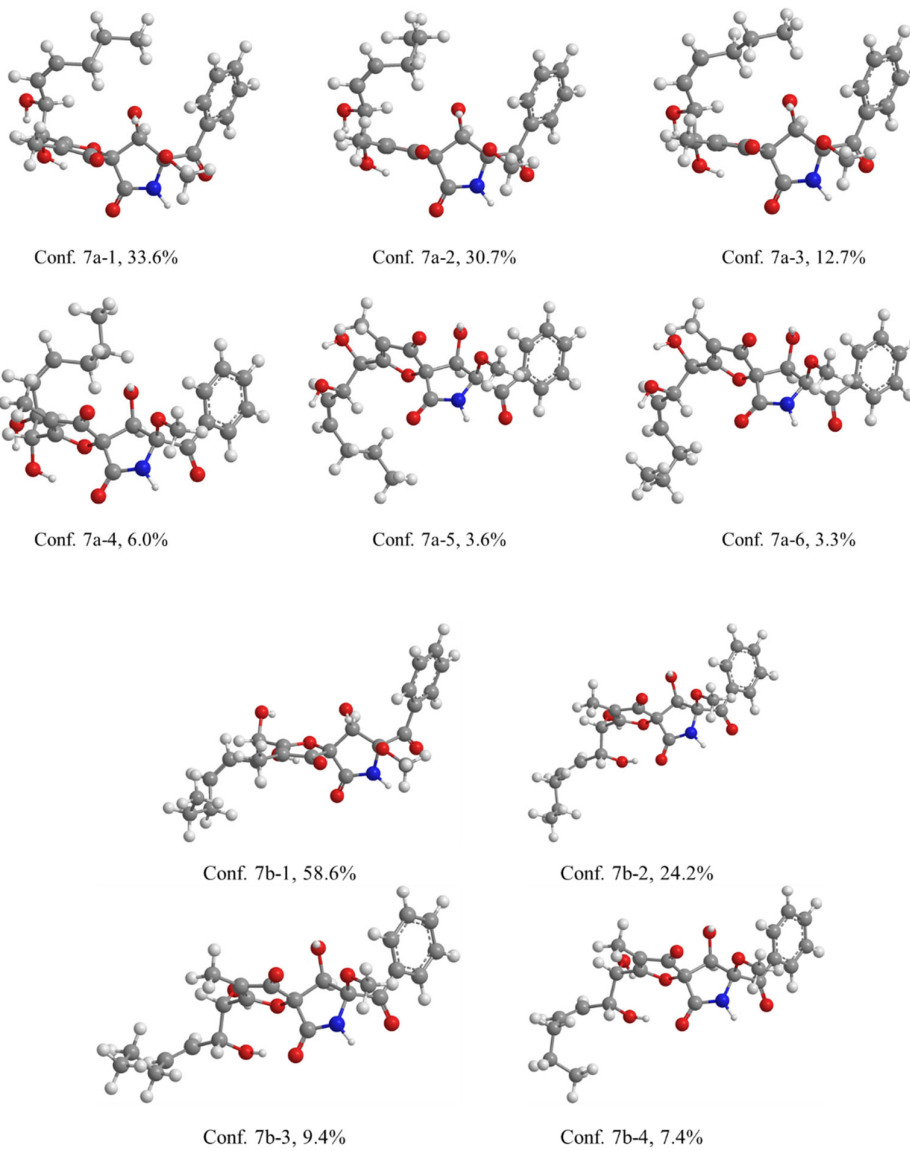

Figure S28.  $^1\text{H}$ -NMR (500 MHz,  $\text{DMSO}-d_6$ ) spectrum of compound 10.

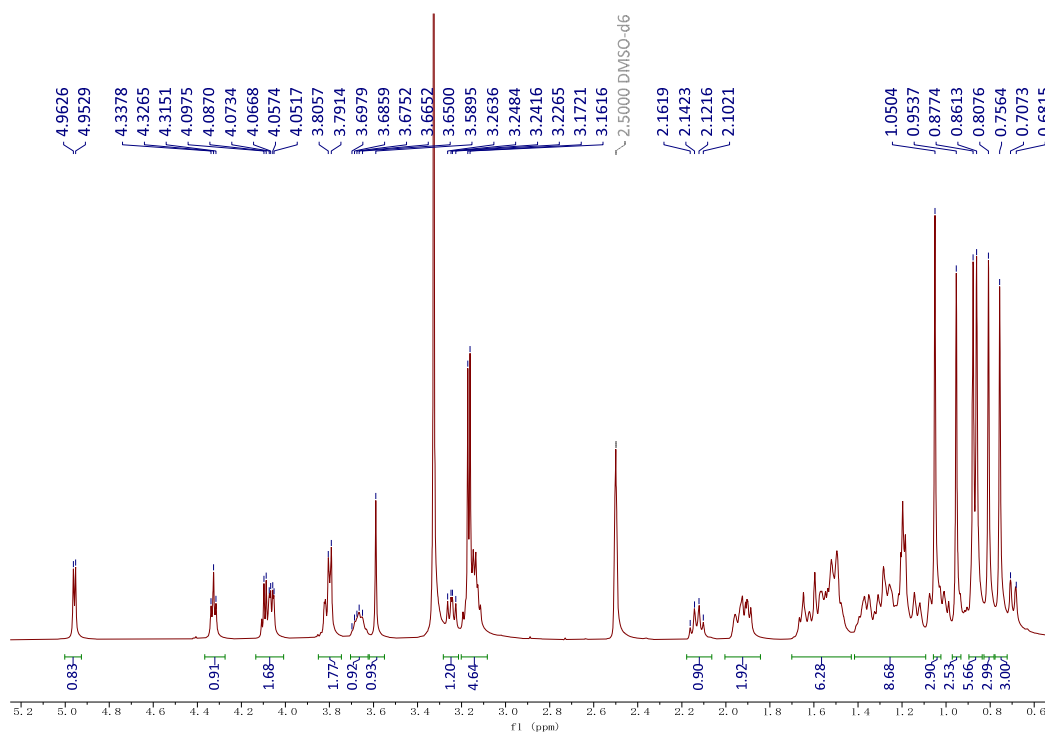

Figure S29.  $^{13}\text{C}$  NMR (125 MHz,  $\text{DMSO}-d_6$ ) and DEPT spectra of compound 10.

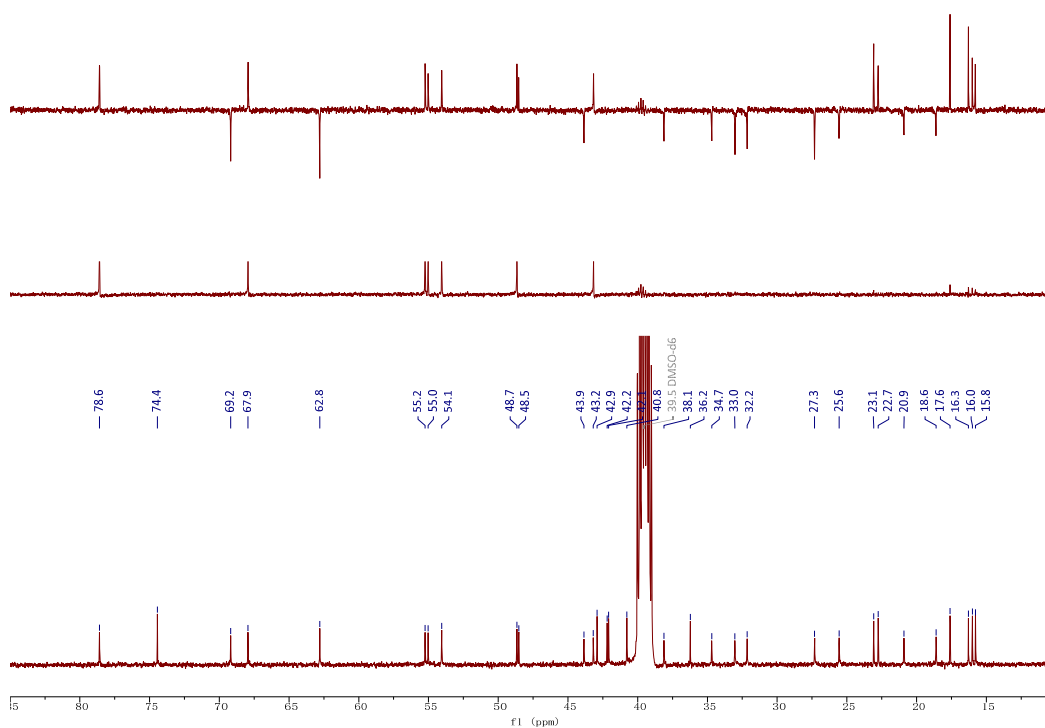



Figure S30.  $^1\text{H}$ - $^1\text{H}$  COSY spectrum of compound 10.

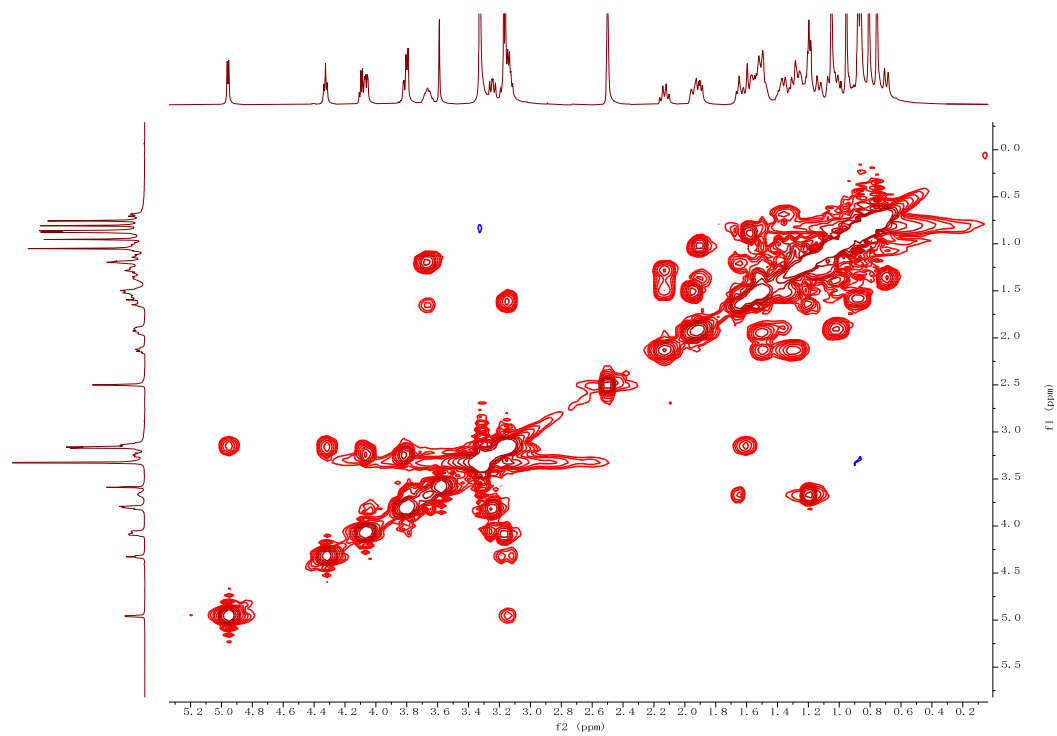

Figure S31. HSQC spectrum of compound 10.

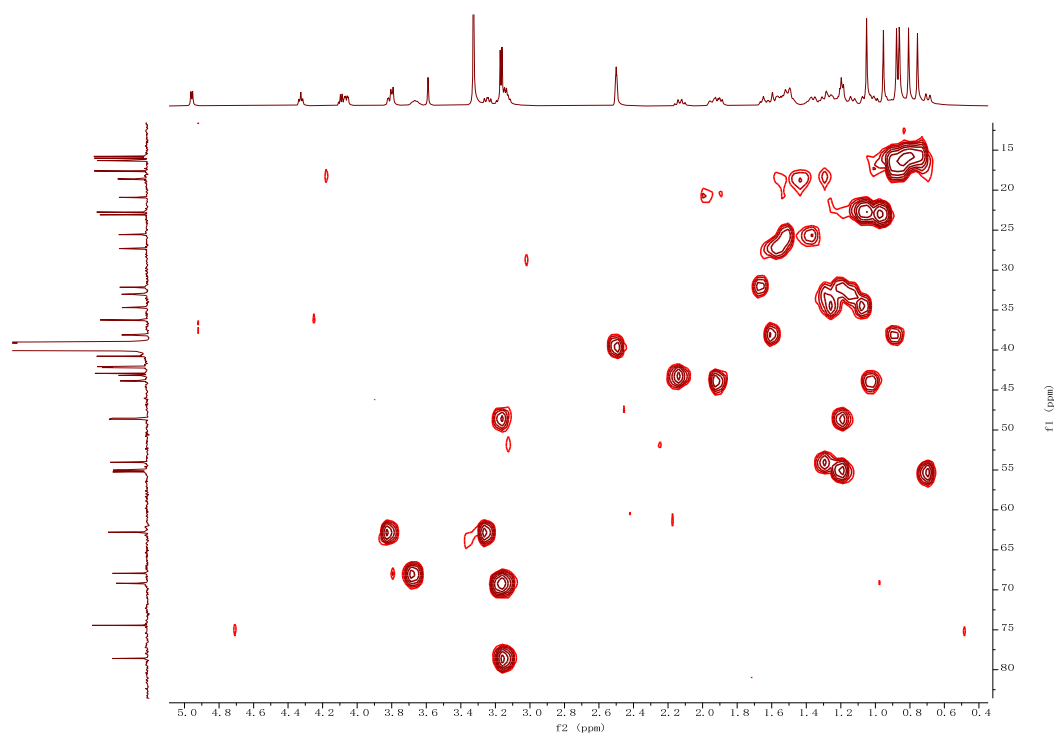

Figure S32. HMBC spectrum of compound 10.

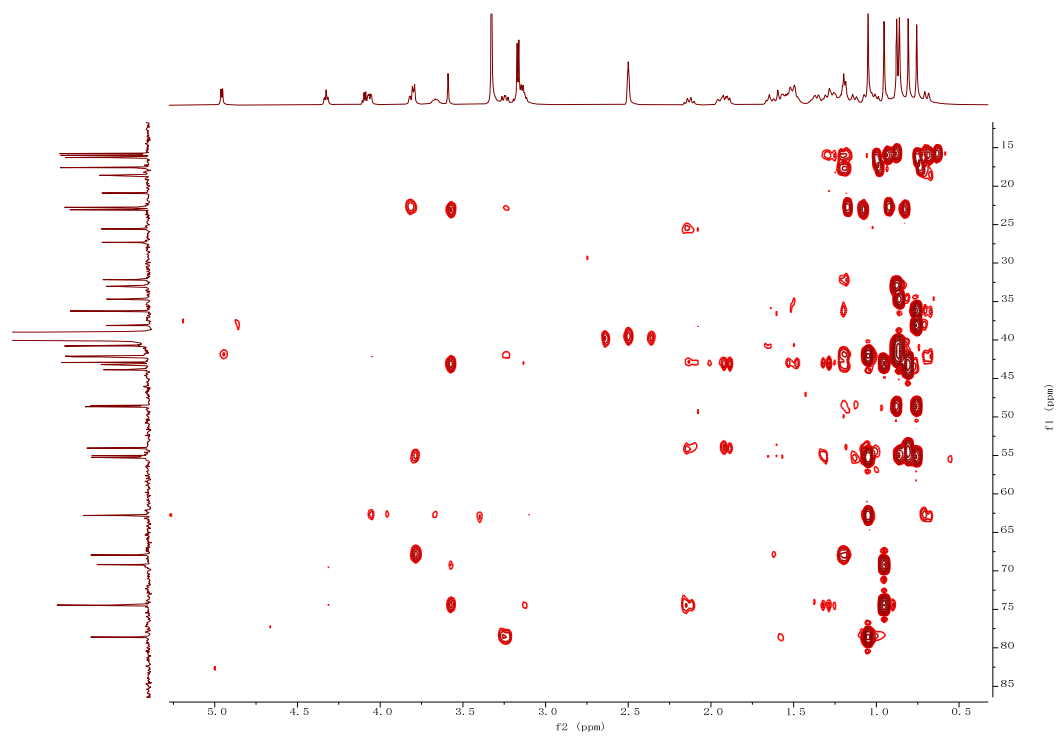

Figure S33. NOESY spectrum of compound 10.

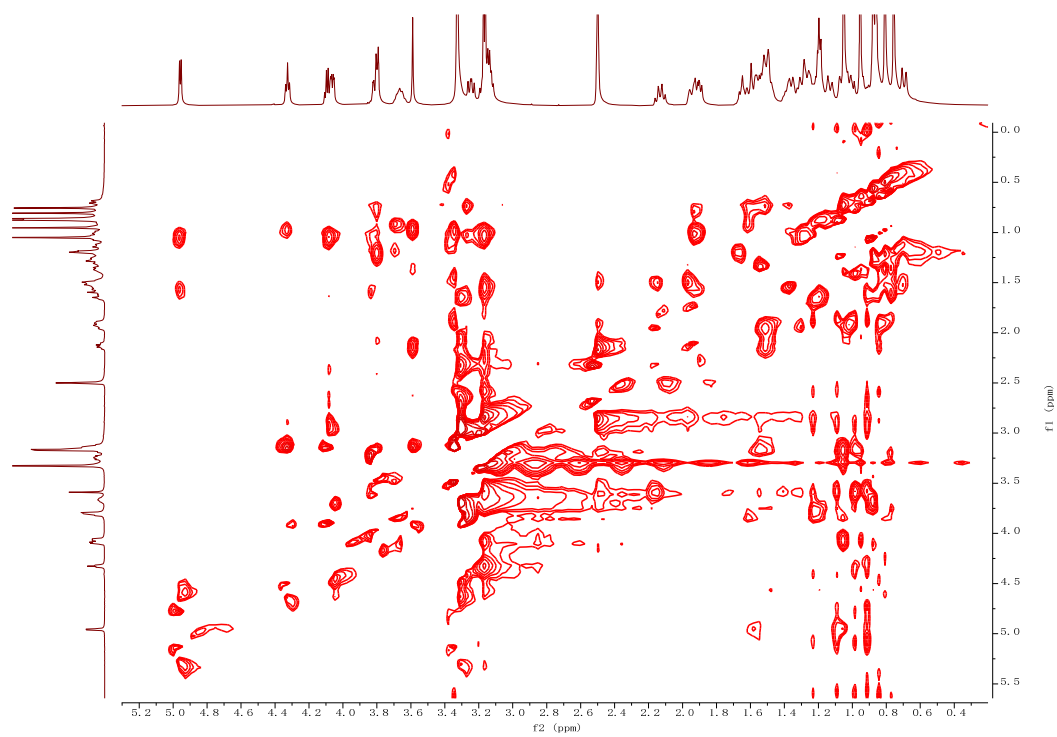

**Figure S34.** HR-ESI-MS spectrum of compound 10.

20210906-SD406-55\_210906110302 #36 RT: 0.53 AV: 1 NL: 3.99E5  
T: FTMS - p ESI Full ms [150.00-2000.00]

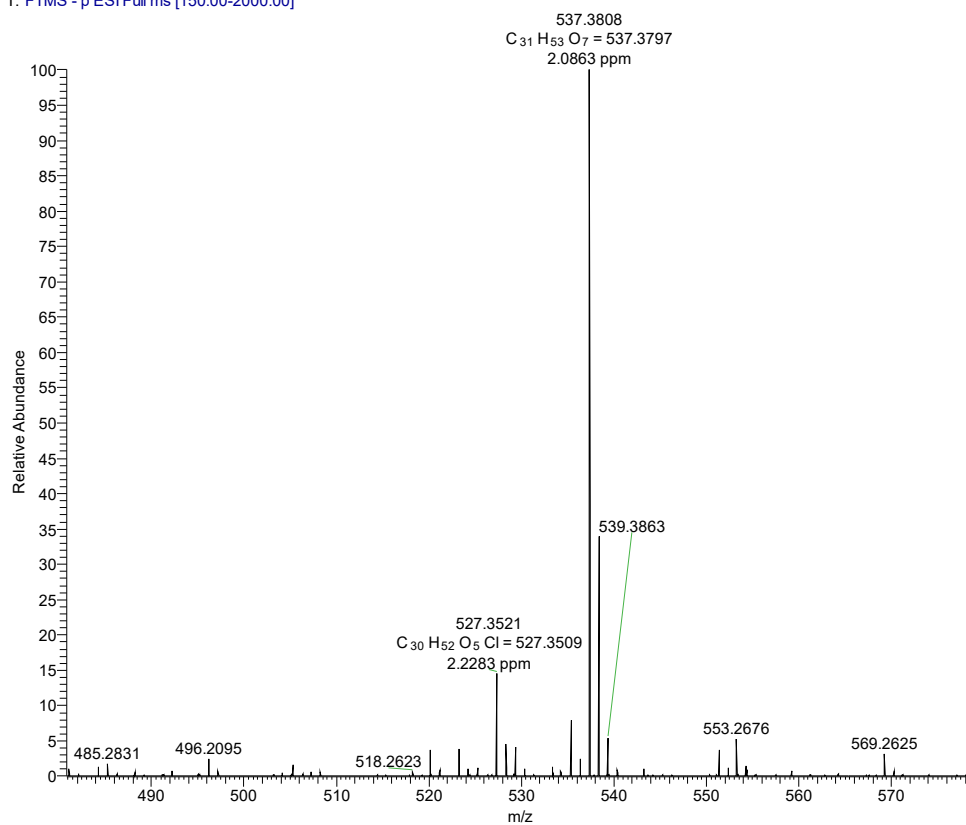

**Figure S35.**  $^1H$ -NMR (500 MHz,  $DMSO-d_6$ ) spectrum of compound 11.

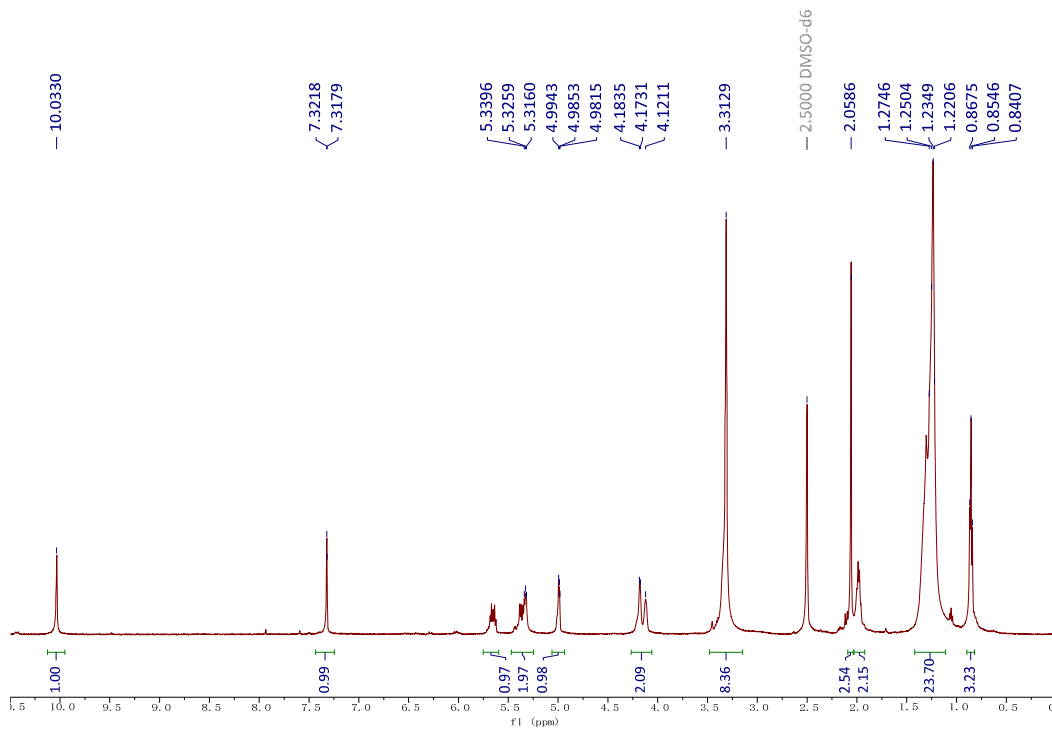

Figure S36.  $^{13}\text{C}$  NMR (125 MHz,  $\text{DMSO}-d_6$ ) and DEPT spectra of compound 11.

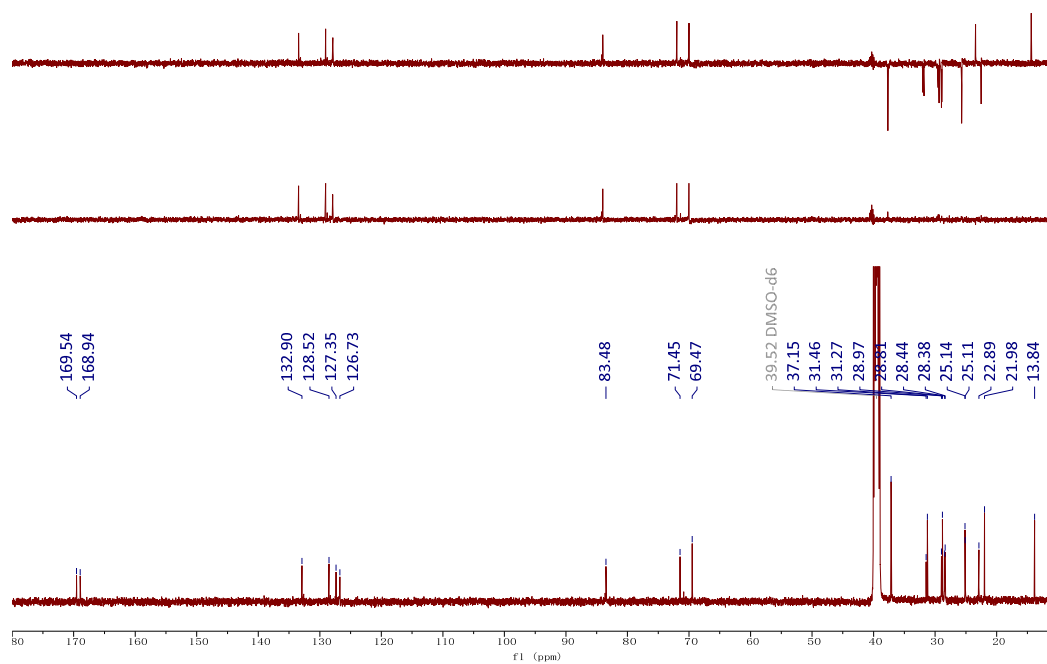

Figure S37.  $^1\text{H}$ - $^1\text{H}$  COSY spectrum of compound 11.

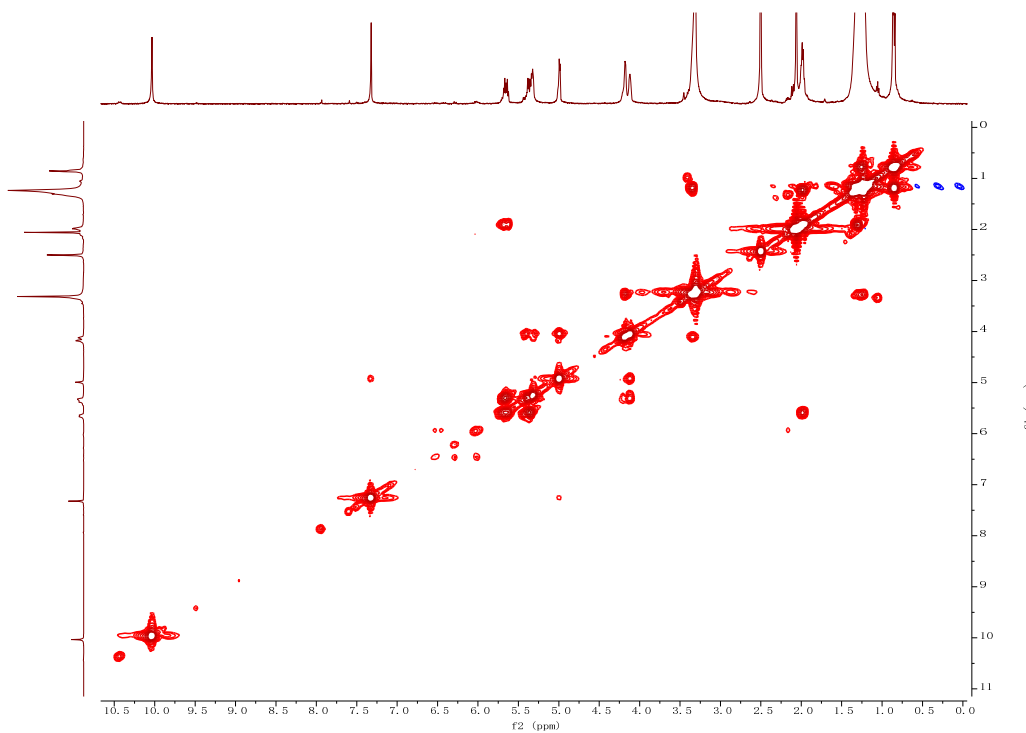

Figure S38 HSQC spectrum of compound 11.

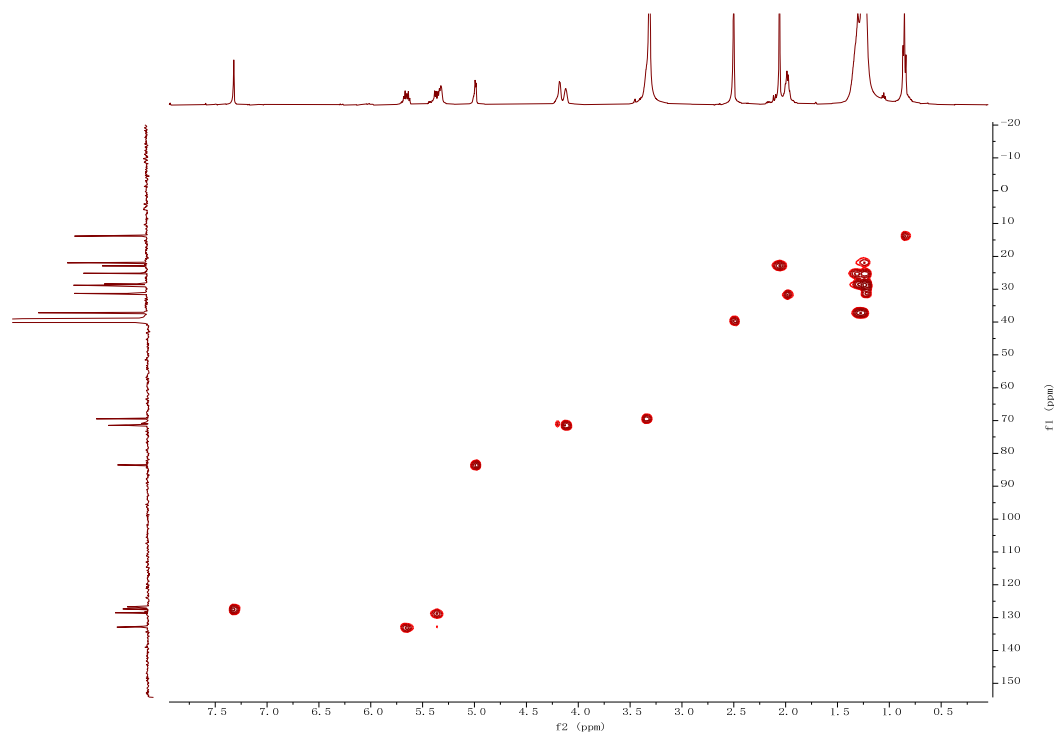

Figure S39. HMBC spectrum of compound 11.

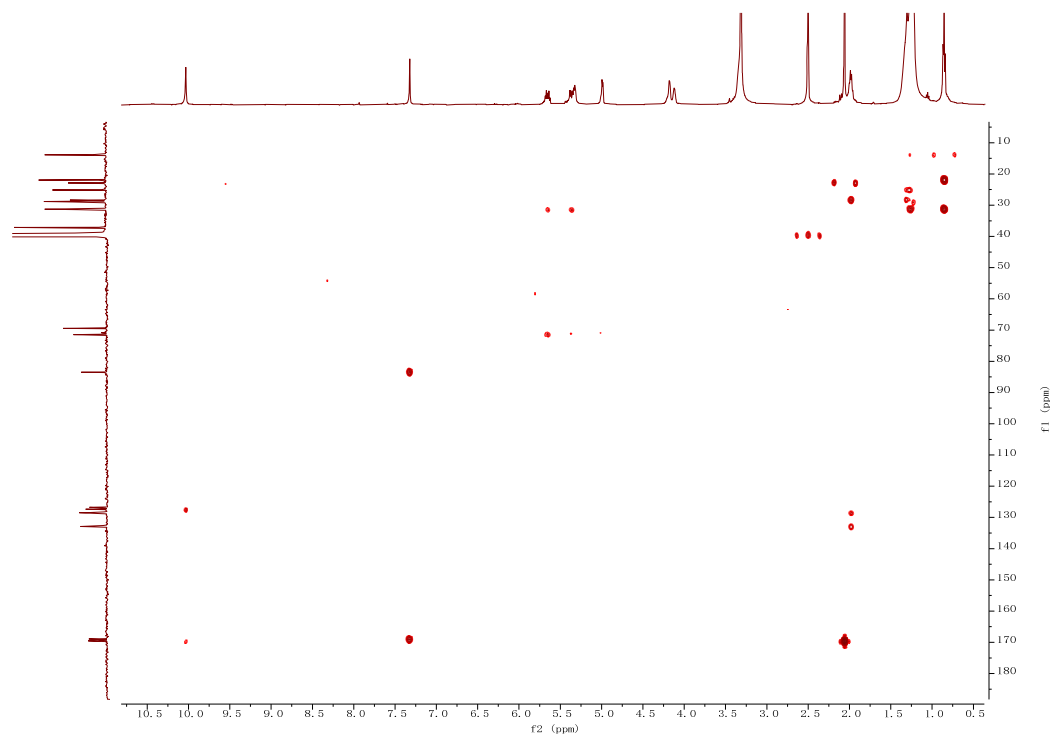

**Figure S40.** HR-ESI-MS spectrum of compound **11**.

20210906-SD406-52\_210906110302 #30 RT: 0.45 AV: 1 NL: 1.18E6  
T: FTMS - p ESI Full ms [150.00-2000.00]

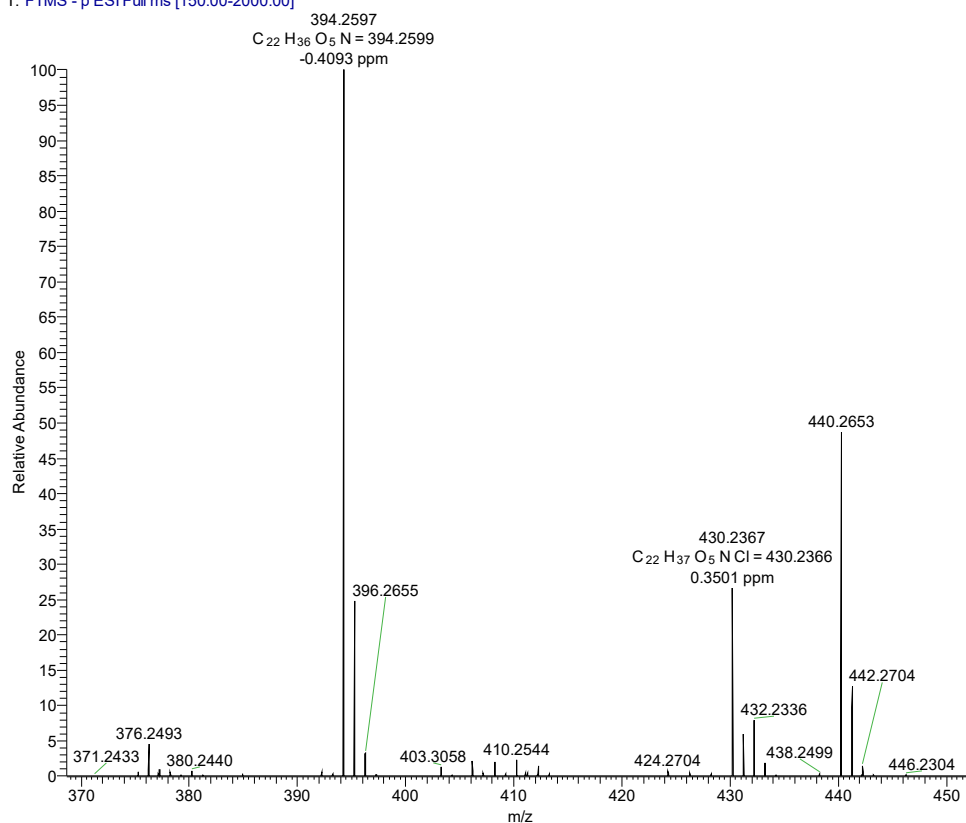

**Figure S41.** ECD spectrum of compound **11**.

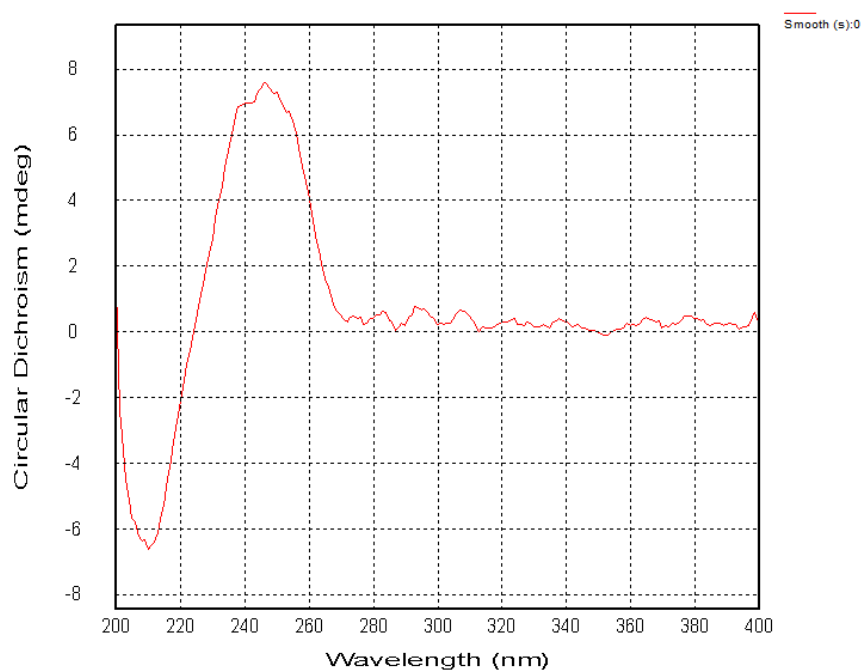

Supplement: s1 [file s1]
